# Supplementary material for: Accelerated evolution of SARS-CoV-2 in free-ranging white-tailed deer
Source: PubMed Central journal article supplement (PMC10462754; doi:10.1038/s41467-023-40706-y), 2023-08-28
Supplement: 41467_2023_40706_MOESM1_ESM.pdf [file 41467_2023_40706_MOESM1_ESM.pdf]

## Supplementary Materials

**Table S1.** Temporal, demographic, and harvest characteristics of the nasal swabs and serum samples collected from white-tailed deer are shown stratified by real-time reverse transcriptase PCR (rRT-PCR) and surrogate virus neutralization results.

|                             | rRT-PCR results     |                     |                      | Surrogate virus neutralization results |               |                           |
|-----------------------------|---------------------|---------------------|----------------------|----------------------------------------|---------------|---------------------------|
|                             | SARS-CoV-2 Negative | SARS-CoV-2 Positive | Estimated Prevalence | Sero-negative                          | Sero-positive | Estimated Sero-prevalence |
| Total                       | 1359                | 163                 | 10.7%                | 890                                    | 274           | 23.5%                     |
| Sex                         |                     |                     |                      |                                        |               |                           |
| Female                      | 649                 | 60                  | 8.5%                 | 405                                    | 126           | 23.7%                     |
| Male                        | 704                 | 102                 | 12.7%                | 481                                    | 145           | 23.2%                     |
| Age                         |                     |                     |                      |                                        |               |                           |
| Adult                       | 1063                | 136                 | 11.3%                | 679                                    | 224           | 24.8%                     |
| Juvenile                    | 273                 | 25                  | 8.4%                 | 193                                    | 45            | 18.9%                     |
| Manner of death             |                     |                     |                      |                                        |               |                           |
| Culled                      | 755                 | 46                  | 5.7%                 | 421                                    | 124           | 22.8%                     |
| Hunter harvested            | 597                 | 116                 | 16.3%                | 464                                    | 149           | 24.3%                     |
| County urban classification |                     |                     |                      |                                        |               |                           |
| Rural                       | 716                 | 121                 | 14.5%                | 502                                    | 174           | 25.7%                     |
| Urban                       | 643                 | 42                  | 6.1%                 | 388                                    | 100           | 20.5%                     |
| Month of collection         |                     |                     |                      |                                        |               |                           |
| October                     | 2                   | 0                   | 0.0%                 | 0                                      | 0             |                           |
| November                    | 829                 | 93                  | 10.1%                | 578                                    | 172           | 22.9%                     |
| December                    | 221                 | 40                  | 15.3%                | 118                                    | 50            | 29.8%                     |
| January                     | 234                 | 30                  | 11.4%                | 148                                    | 40            | 21.3%                     |
| February                    | 72                  | 0                   | 0.0%                 | 46                                     | 11            | 19.3%                     |
| March                       | 1                   | 0                   | 0.0%                 | 0                                      | 1             | 100.0%                    |

**Table S2.** Estimated SARS-CoV-2 prevalence is shown by county with total number of samples collected and urban/rural classification. Number of samples that were collected from white-tailed deer culled in population management programs are indicated.

| County     | Urban | Total Samples | Culled Deer Samples | Positive Samples | Prevalence |
|------------|-------|---------------|---------------------|------------------|------------|
| Adams      | Rural | 17            | 0                   | 3                | 18%        |
| Ashland    | Rural | 20            | 0                   | 1                | 5%         |
| Ashtabula  | Rural | 2             | 0                   | 0                | 0%         |
| Athens     | Rural | 33            | 0                   | 12               | 36%        |
| Belmont    | Rural | 3             | 0                   | 2                | 67%        |
| Brown      | Urban | 27            | 0                   | 11               | 41%        |
| Butler     | Urban | 6             | 0                   | 0                | 0%         |
| Carroll    | Rural | 4             | 0                   | 0                | 0%         |
| Champaign  | Rural | 10            | 0                   | 2                | 20%        |
| Clark      | Rural | 7             | 0                   | 1                | 14%        |
| Clermont   | Urban | 26            | 0                   | 6                | 23%        |
| Clinton    | Rural | 5             | 0                   | 1                | 20%        |
| Columbiana | Rural | 4             | 0                   | 1                | 25%        |
| Coshocton  | Rural | 11            | 0                   | 1                | 9%         |
| Crawford   | Rural | 11            | 0                   | 3                | 27%        |
| Cuyahoga   | Urban | 183           | 179                 | 1                | 1%         |
| Darke      | Rural | 1             | 0                   | 0                | 0%         |
| Defiance   | Rural | 3             | 0                   | 0                | 0%         |
| Delaware   | Urban | 55            | 40                  | 1                | 2%         |
| Erie       | Rural | 179           | 177                 | 2                | 1%         |
| Fairfield  | Urban | 35            | 25                  | 4                | 11%        |
| Franklin   | Urban | 151           | 149                 | 0                | 0%         |
| Fulton     | Rural | 1             | 0                   | 0                | 0%         |
| Gallia     | Rural | 4             | 0                   | 1                | 25%        |
| Geauga     | Urban | 1             | 0                   | 0                | 0%         |
| Greene     | Rural | 11            | 0                   | 0                | 0%         |
| Guernsey   | Rural | 4             | 0                   | 0                | 0%         |
| Hamilton   | Urban | 9             | 0                   | 1                | 11%        |
| Hancock    | Rural | 1             | 0                   | 0                | 0%         |
| Hardin     | Rural | 4             | 0                   | 0                | 0%         |
| Harrison   | Rural | 5             | 0                   | 3                | 60%        |
| Henry      | Rural | 2             | 0                   | 0                | 0%         |
| Highland   | Rural | 9             | 0                   | 4                | 44%        |
| Hocking    | Urban | 12            | 0                   | 3                | 25%        |
| Holmes     | Rural | 8             | 0                   | 1                | 13%        |

|            |       |     |     |    |      |
|------------|-------|-----|-----|----|------|
| Huron      | Rural | 25  | 0   | 6  | 24%  |
| Jackson    | Rural | 9   | 0   | 3  | 33%  |
| Jefferson  | Rural | 3   | 0   | 0  | 0%   |
| Knox       | Rural | 5   | 0   | 1  | 20%  |
| Lawrence   | Rural | 1   | 0   | 1  | 100% |
| Licking    | Urban | 30  | 0   | 0  | 0%   |
| Logan      | Rural | 23  | 0   | 1  | 4%   |
| Lorain     | Urban | 40  | 35  | 2  | 5%   |
| Lucas      | Rural | 43  | 41  | 13 | 30%  |
| Madison    | Urban | 3   | 0   | 1  | 33%  |
| Mahoning   | Rural | 2   | 0   | 0  | 0%   |
| Marion     | Rural | 7   | 0   | 0  | 0%   |
| Medina     | Urban | 9   | 0   | 3  | 33%  |
| Meigs      | Rural | 14  | 0   | 5  | 36%  |
| Miami      | Rural | 7   | 0   | 2  | 29%  |
| Monroe     | Rural | 2   | 0   | 0  | 0%   |
| Montgomery | Rural | 1   | 0   | 0  | 0%   |
| Morgan     | Rural | 16  | 0   | 0  | 0%   |
| Morrow     | Urban | 5   | 0   | 0  | 0%   |
| Muskingum  | Rural | 10  | 0   | 1  | 10%  |
| Noble      | Rural | 8   | 0   | 1  | 13%  |
| Ottawa     | Rural | 1   | 0   | 0  | 0%   |
| Paulding   | Rural | 1   | 0   | 0  | 0%   |
| Perry      | Urban | 4   | 0   | 1  | 25%  |
| Pickaway   | Urban | 15  | 0   | 5  | 33%  |
| Pike       | Rural | 8   | 0   | 0  | 0%   |
| Portage    | Rural | 13  | 0   | 0  | 0%   |
| Preble     | Rural | 3   | 0   | 0  | 0%   |
| Putnam     | Rural | 1   | 0   | 0  | 0%   |
| Richland   | Rural | 28  | 0   | 0  | 0%   |
| Ross       | Rural | 3   | 0   | 2  | 67%  |
| Sandusky   | Rural | 4   | 0   | 1  | 25%  |
| Scioto     | Rural | 9   | 0   | 2  | 22%  |
| Seneca     | Rural | 7   | 0   | 2  | 29%  |
| Shelby     | Rural | 4   | 0   | 0  | 0%   |
| Stark      | Rural | 14  | 0   | 2  | 14%  |
| Summit     | Rural | 110 | 106 | 30 | 27%  |
| Trumbull   | Rural | 2   | 0   | 1  | 50%  |
| Tuscarawas | Rural | 4   | 0   | 1  | 25%  |
| Union      | Urban | 58  | 49  | 0  | 0%   |
| Van Wert   | Rural | 1   | 0   | 0  | 0%   |

|            |       |      |     |     |     |
|------------|-------|------|-----|-----|-----|
| Vinton     | Rural | 2    | 0   | 1   | 50% |
| Warren     | Urban | 16   | 0   | 3   | 19% |
| Washington | Rural | 47   | 0   | 5   | 11% |
| Wayne      | Rural | 11   | 0   | 0   | 0%  |
| Williams   | Rural | 6    | 0   | 0   | 0%  |
| Wood       | Rural | 4    | 0   | 0   | 0%  |
| Wyandot    | Rural | 19   | 0   | 2   | 11% |
| Total      |       | 1522 | 801 | 163 | 11% |

**Table S3a.** Results from mixed-effects logistic regression with random effects accounting for county level clustering is shown for all the covariates for which we adjusted. The reference category for each risk factor is indicated as the top row. October, February, and March were excluded from the model because no nasal swabs collected from white-tailed deer during those months tested positive for SARS-CoV-2 (Figure S1). The interaction term is presented as a model equation coefficient, not as an odds ratio for a specific covariate pattern. The Bonferroni corrected p-value cutoff for significance is 0.007.

| Covariate                                                             | Categories       | Model coefficient | Odds Ratio | 95% Confidence interval OR | P-value (two-sided z test) |
|-----------------------------------------------------------------------|------------------|-------------------|------------|----------------------------|----------------------------|
| Urban county classification                                           | Urban            |                   |            |                            |                            |
|                                                                       | Rural            | 2.69              | 14.7       | 2.2 – 100.0                | 0.006                      |
| WTD manner of death                                                   | Culled           |                   |            |                            |                            |
|                                                                       | Hunter-harvested | 2.84              | 17.1       | 4.0 – 73.5                 | <0.0005                    |
| Interaction term for manner of death with urban county classification | Hunted*Rural     | -2.90             | 0.055      | 0.008 – 0.397              | 0.004                      |
| Sex                                                                   | Female           |                   |            |                            |                            |
|                                                                       | Male             | 0.42              | 1.5        | 1.0 – 2.2                  | 0.034                      |
| Age                                                                   | Adult            |                   |            |                            |                            |
|                                                                       | Juvenile         | - 0.32            | 0.7        | 0.4 – 1.2                  | 0.214                      |
| Month of collection                                                   | November         |                   |            |                            |                            |
|                                                                       | December         | 0.58              | 1.8        | 1.0 – 3.0                  | 0.035                      |
|                                                                       | January          | - 0.17            | 0.8        | 0.2 – 3.8                  | 0.821                      |

**Table S3b.** The estimated prevalence and seroprevalence of SARS-CoV-2 is shown stratified based on the manner of death and the urban/rural designation of the county from which the WTD was harvested.

Sample size for each category is indicated parenthetically.

|                        |                       | <b>County designation</b> |              |              |
|------------------------|-----------------------|---------------------------|--------------|--------------|
|                        |                       | <b>Prevalence</b>         |              |              |
|                        |                       | Rural                     | Urban        | Total        |
| <b>Manner of death</b> | Culled                | 13.3% (324)               | 0.6% (477)   | 5.7% (801)   |
|                        | Hunted                | 15.2% (508)               | 19.0% (205)  | 16.3% (713)  |
|                        | Total                 | 14.4% (832)               | 6.2% (682)   | 10.7% (1514) |
|                        | <b>Seroprevalence</b> |                           |              |              |
|                        |                       | Rural                     | Urban        | Total        |
|                        | Culled                | 23.6% (225)               | 22.2% (320)  | 22.8% (545)  |
|                        | Hunted                | 26.8% (447)               | 17.5% (166)  | 24.3% (613)  |
| Total                  | 25.7% (672)           | 20.6% (486)               | 23.6% (1158) |              |

**Table S4.** SARS-CoV-2 viruses sequenced from white-tailed deer shown with county, date of collection, lineage, and variant data.

|    | Virus Name                        | Metropolitan Area               | County     | Environment | Collection date | Lineage   | Variant |
|----|-----------------------------------|---------------------------------|------------|-------------|-----------------|-----------|---------|
| 1  | hCoV-19/deer/USA/OH-OSU-1331/2021 | Cincinnati–Wilmington–Maysville | Brown      | Urban       | 11/13/2021      | B.1.1.7   | Alpha   |
| 2  | hCoV-19/deer/USA/OH-OSU-1335/2021 | Cincinnati–Wilmington–Maysville | Brown      | Urban       | 11/13/2021      | B.1.1.7   | Alpha   |
| 3  | hCoV-19/deer/USA/OH-OSU-1338/2021 | Cincinnati–Wilmington–Maysville | Brown      | Urban       | 11/13/2021      | B.1.1.7   | Alpha   |
| 4  | hCoV-19/deer/USA/OH-OSU-2088/2021 | Cincinnati–Wilmington–Maysville | Brown      | Urban       | 11/30/2021      | AY.103    | Delta   |
| 5  | hCoV-19/deer/USA/OH-OSU-2070/2021 | Cincinnati–Wilmington–Maysville | Brown      | Urban       | 12/4/2021       | AY.103    | Delta   |
| 6  | hCoV-19/deer/USA/OH-OSU-2072/2021 | Cincinnati–Wilmington–Maysville | Brown      | Urban       | 12/4/2021       | B.1.617.2 | Delta   |
| 7  | hCoV-19/deer/USA/OH-OSU-1271/2021 | Cincinnati–Wilmington–Maysville | Clermont   | Urban       | 11/6/2021       | AY.103    | Delta   |
| 8  | hCoV-19/deer/USA/OH-OSU-1292/2021 | Cincinnati–Wilmington–Maysville | Clermont   | Urban       | 11/6/2021       | AY.39     | Delta   |
| 9  | hCoV-19/deer/USA/OH-OSU-2083/2021 | Cincinnati–Wilmington–Maysville | Clermont   | Urban       | 11/30/2021      | AY.103    | Delta   |
| 10 | hCoV-19/deer/USA/OH-OSU-2084/2021 | Cincinnati–Wilmington–Maysville | Clermont   | Urban       | 11/30/2021      | AY.103    | Delta   |
| 11 | hCoV-19/deer/USA/OH-OSU-1297/2021 | Cincinnati–Wilmington–Maysville | Warren     | Urban       | 11/6/2021       | B.1.617.2 | Delta   |
| 12 | hCoV-19/deer/USA/OH-OSU-2069/2021 | Cincinnati–Wilmington–Maysville | Warren     | Urban       | 12/4/2021       | AY.103    | Delta   |
| 13 | hCoV-19/deer/USA/OH-OSU-1106/2021 | Cleveland–Akron–Canton          | Erie       | Rural       | 11/15/2021      | AY.25     | Delta   |
| 14 | hCoV-19/deer/USA/OH-OSU-1114/2021 | Cleveland–Akron–Canton          | Huron      | Rural       | 11/13/2021      | AY.25     | Delta   |
| 15 | hCoV-19/deer/USA/OH-OSU-1950/2021 | Cleveland–Akron–Canton          | Huron      | Rural       | 11/29/2021      | AY.25     | Delta   |
| 16 | hCoV-19/deer/USA/OH-OSU-2016/2021 | Cleveland–Akron–Canton          | Medina     | Urban       | 11/30/2021      | AY.25     | Delta   |
| 17 | hCoV-19/deer/USA/OH-OSU-2320/2021 | Cleveland–Akron–Canton          | Medina     | Urban       | 12/4/2021       | AY.25     | Delta   |
| 18 | hCoV-19/deer/USA/OH-OSU-2323/2021 | Cleveland–Akron–Canton          | Medina     | Urban       | 12/4/2021       | AY.25     | Delta   |
| 19 | hCoV-19/deer/USA/OH-OSU-1206/2021 | Cleveland–Akron–Canton          | Summit     | Rural       | 11/13/2021      | AY.25     | Delta   |
| 20 | hCoV-19/deer/USA/OH-OSU-0735/2022 | Cleveland–Akron–Canton          | Summit     | Rural       | 1/19/2022       | AY.3      | Delta   |
| 21 | hCoV-19/deer/USA/OH-OSU-0921/2022 | Cleveland–Akron–Canton          | Summit     | Rural       | 1/19/2022       | AY.3      | Delta   |
| 22 | hCoV-19/deer/USA/OH-OSU-0716/2022 | Cleveland–Akron–Canton          | Summit     | Rural       | 1/20/2022       | AY.103    | Delta   |
| 23 | hCoV-19/deer/USA/OH-OSU-0926/2022 | Cleveland–Akron–Canton          | Summit     | Rural       | 1/20/2022       | AY.103    | Delta   |
| 24 | hCoV-19/deer/USA/OH-OSU-2307/2021 | Cleveland–Akron–Canton          | Tuscarawas | Rural       | 12/4/2021       | AY.103    | Delta   |
| 25 | hCoV-19/deer/USA/OH-OSU-2105/2021 | Columbus–Marion–Zanesville      | Fairfield  | Urban       | 11/29/2021      | AY.103    | Delta   |
| 26 | hCoV-19/deer/USA/OH-OSU-2126/2021 | Columbus–Marion–Zanesville      | Fairfield  | Urban       | 11/29/2021      | AY.103    | Delta   |
| 27 | hCoV-19/deer/USA/OH-OSU-2111/2021 | Columbus–Marion–Zanesville      | Fairfield  | Urban       | 11/29/2021      | AY.25     | Delta   |
| 28 | hCoV-19/deer/USA/OH-OSU-2125/2021 | Columbus–Marion–Zanesville      | Hocking    | Urban       | 11/29/2021      | AY.25     | Delta   |
| 29 | hCoV-19/deer/USA/OH-OSU-1214/2021 | Columbus–Marion–Zanesville      | Knox       | Rural       | 11/13/2021      | AY.118    | Delta   |
| 30 | hCoV-19/deer/USA/OH-OSU-1790/2021 | Columbus–Marion–Zanesville      | Licking    | Urban       | 11/8/2021       | B.1.617.2 | Delta   |
| 31 | hCoV-19/deer/USA/OH-OSU-2222/2021 | Columbus–Marion–Zanesville      | Logan      | Rural       | 12/4/2021       | AY.25     | Delta   |
| 32 | hCoV-19/deer/USA/OH-OSU-1434/2021 | Columbus–Marion–Zanesville      | Madison    | Urban       | 11/6/2021       | AY.25     | Delta   |
| 33 | hCoV-19/deer/USA/OH-OSU-2113/2021 | Columbus–Marion–Zanesville      | Perry      | Urban       | 11/29/2021      | AY.100    | Delta   |
| 34 | hCoV-19/deer/USA/OH-OSU-1459/2021 | Columbus–Marion–Zanesville      | Pickaway   | Urban       | 11/13/2021      | B.1.1.7   | Alpha   |
| 35 | hCoV-19/deer/USA/OH-OSU-1480/2021 | Columbus–Marion–Zanesville      | Pickaway   | Urban       | 11/13/2021      | B.1.1.7   | Alpha   |
| 36 | hCoV-19/deer/USA/OH-OSU-1490/2021 | Columbus–Marion–Zanesville      | Pickaway   | Urban       | 11/13/2021      | B.1.1.7   | Alpha   |
| 37 | hCoV-19/deer/USA/OH-OSU-1419/2021 | Dayton–Springfield–Kettering    | Champaign  | Rural       | 11/13/2021      | AY.25     | Delta   |
| 38 | hCoV-19/deer/USA/OH-OSU-1429/2021 | Dayton–Springfield–Kettering    | Champaign  | Rural       | 11/13/2021      | AY.25     | Delta   |
| 39 | hCoV-19/deer/USA/OH-OSU-1440/2021 | Dayton–Springfield–Kettering    | Clark      | Rural       | 11/8/2021       | AY.25     | Delta   |
| 40 | hCoV-19/deer/USA/OH-OSU-1710/2021 | Dayton–Springfield–Kettering    | Miami      | Rural       | 12/4/2021       | AY.103    | Delta   |
| 41 | hCoV-19/deer/USA/OH-OSU-1734/2021 | Dayton–Springfield–Kettering    | Miami      | Rural       | 12/4/2021       | AY.103    | Delta   |

|    |                                   |                             |            |       |            |           |       |
|----|-----------------------------------|-----------------------------|------------|-------|------------|-----------|-------|
| 42 | hCoV-19/deer/USA/OH-OSU-1111/2021 | Mansfield–Ashland–Bucyrus   | Crawford   | Rural | 11/22/2021 | AY.25     | Delta |
| 43 | hCoV-19/deer/USA/OH-OSU-2011/2021 | Mansfield–Ashland–Bucyrus   | Crawford   | Rural | 11/30/2021 | AY.25     | Delta |
| 44 | hCoV-19/deer/USA/OH-OSU-1983/2021 | Parkersburg-Marietta-Vienna | Washington | Rural | 11/29/2021 | AY.3      | Delta |
| 45 | hCoV-19/deer/USA/OH-OSU-1985/2021 | Parkersburg-Marietta-Vienna | Washington | Rural | 11/29/2021 | AY.3      | Delta |
| 46 | hCoV-19/deer/USA/OH-OSU-1988/2021 | Parkersburg-Marietta-Vienna | Washington | Rural | 11/29/2021 | AY.3.1    | Delta |
| 47 | hCoV-19/deer/USA/OH-OSU-1842/2021 | Parkersburg-Marietta-Vienna | Washington | Rural | 11/30/2021 | AY.44     | Delta |
| 48 | hCoV-19/deer/USA/OH-OSU-2184/2021 | Parkersburg-Marietta-Vienna | Washington | Rural | 12/4/2021  | AY.25.1   | Delta |
| 49 | hCoV-19/deer/USA/OH-OSU-1263/2021 | Rural                       | Adams      | Rural | 11/13/2021 | AY.25     | Delta |
| 50 | hCoV-19/deer/USA/OH-OSU-1265/2021 | Rural                       | Adams      | Rural | 11/13/2021 | AY.3      | Delta |
| 51 | hCoV-19/deer/USA/OH-OSU-1756/2021 | Rural                       | Athens     | Rural | 11/6/2021  | AY.3.1    | Delta |
| 52 | hCoV-19/deer/USA/OH-OSU-1793/2021 | Rural                       | Athens     | Rural | 11/7/2021  | AY.44     | Delta |
| 53 | hCoV-19/deer/USA/OH-OSU-1834/2021 | Rural                       | Athens     | Rural | 11/30/2021 | AY.20     | Delta |
| 54 | hCoV-19/deer/USA/OH-OSU-1839/2021 | Rural                       | Athens     | Rural | 11/30/2021 | AY.25.1   | Delta |
| 55 | hCoV-19/deer/USA/OH-OSU-1703/2021 | Rural                       | Athens     | Rural | 11/30/2021 | AY.44     | Delta |
| 56 | hCoV-19/deer/USA/OH-OSU-1828/2021 | Rural                       | Athens     | Rural | 11/30/2021 | AY.44     | Delta |
| 57 | hCoV-19/deer/USA/OH-OSU-1830/2021 | Rural                       | Athens     | Rural | 11/30/2021 | AY.44     | Delta |
| 58 | hCoV-19/deer/USA/OH-OSU-1833/2021 | Rural                       | Athens     | Rural | 11/30/2021 | AY.44     | Delta |
| 59 | hCoV-19/deer/USA/OH-OSU-1744/2021 | Rural                       | Athens     | Rural | 11/30/2021 | AY.75     | Delta |
| 60 | hCoV-19/deer/USA/OH-OSU-1243/2021 | Rural                       | Harrison   | Rural | 11/13/2021 | AY.103    | Delta |
| 61 | hCoV-19/deer/USA/OH-OSU-2249/2021 | Rural                       | Harrison   | Rural | 12/4/2021  | AY.103    | Delta |
| 62 | hCoV-19/deer/USA/OH-OSU-1403/2021 | Rural                       | Highland   | Rural | 11/8/2021  | B.1.1.7   | Alpha |
| 63 | hCoV-19/deer/USA/OH-OSU-2169/2021 | Rural                       | Highland   | Rural | 12/4/2021  | AY.109    | Delta |
| 64 | hCoV-19/deer/USA/OH-OSU-2077/2021 | Rural                       | Highland   | Rural | 12/4/2021  | B.1.1.7   | Alpha |
| 65 | hCoV-19/deer/USA/OH-OSU-1778/2021 | Rural                       | Jackson    | Rural | 11/6/2021  | AY.103    | Delta |
| 66 | hCoV-19/deer/USA/OH-OSU-1439/2021 | Rural                       | Jackson    | Rural | 11/13/2021 | AY.39     | Delta |
| 67 | hCoV-19/deer/USA/OH-OSU-2152/2021 | Rural                       | Meigs      | Rural | 12/4/2021  | AY.20     | Delta |
| 68 | hCoV-19/deer/USA/OH-OSU-2153/2021 | Rural                       | Meigs      | Rural | 12/4/2021  | B.1.1.7   | Alpha |
| 69 | hCoV-19/deer/USA/OH-OSU-2306/2021 | Rural                       | Noble      | Rural | 12/4/2021  | AY.25.1   | Delta |
| 70 | hCoV-19/deer/USA/OH-OSU-1720/2021 | Rural                       | Vinton     | Rural | 11/13/2021 | AY.75     | Delta |
| 71 | hCoV-19/deer/USA/OH-OSU-1099/2021 | Rural                       | Wyandot    | Rural | 11/14/2021 | AY.25     | Delta |
| 72 | hCoV-19/deer/USA/OH-OSU-1100/2021 | Rural                       | Wyandot    | Rural | 11/14/2021 | AY.25     | Delta |
| 73 | hCoV-19/deer/USA/OH-OSU-2156/2021 | Toledo–Findlay-Tiffin       | Lucas      | Rural | 12/7/2021  | AY.103    | Delta |
| 74 | hCoV-19/deer/USA/OH-OSU-2158/2021 | Toledo–Findlay-Tiffin       | Lucas      | Rural | 12/7/2021  | AY.103    | Delta |
| 75 | hCoV-19/deer/USA/OH-OSU-2324/2021 | Toledo–Findlay-Tiffin       | Lucas      | Rural | 12/7/2021  | AY.103    | Delta |
| 76 | hCoV-19/deer/USA/OH-OSU-2326/2021 | Toledo–Findlay-Tiffin       | Lucas      | Rural | 12/7/2021  | AY.103    | Delta |
| 77 | hCoV-19/deer/USA/OH-OSU-2327/2021 | Toledo–Findlay-Tiffin       | Lucas      | Rural | 12/7/2021  | AY.103    | Delta |
| 78 | hCoV-19/deer/USA/OH-OSU-1144/2021 | Toledo–Findlay-Tiffin       | Sandusky   | Rural | 11/15/2021 | AY.3      | Delta |
| 79 | hCoV-19/deer/USA/OH-OSU-1104/2021 | Toledo–Findlay-Tiffin       | Seneca     | Rural | 11/15/2021 | B.1.617.2 | Delta |
| 80 | hCoV-19/deer/USA/OH-OSU-2253/2021 | Youngstown–Warren           | Columbiana | Rural | 12/4/2021  | AY.103    | Delta |



**Table S5.** Evolutionary rates in white-tailed deer and humans (nucleotide subs/st/yr)**Entire genome**

| Host  | Dataset             | Mean                 | 95% HPD                    |
|-------|---------------------|----------------------|----------------------------|
| Deer  | Alpha               | $1.8 \times 10^{-3}$ | $1.6 - 2.0 \times 10^{-3}$ |
| Human | Alpha               | $5.9 \times 10^{-4}$ | $5.5 - 6.4 \times 10^{-4}$ |
| Deer  | Delta               | $1.6 \times 10^{-3}$ | $1.5 - 1.8 \times 10^{-3}$ |
| Human | Delta               | $6.0 \times 10^{-4}$ | $5.9 - 6.6 \times 10^{-4}$ |
| Human | <i>Pekar et al.</i> | $1.3 \times 10^{-3}$ | $1.1 - 1.6 \times 10^{-3}$ |

**By genome partition**

| Host  | Dataset | Partition    | Mean                  | 95% HPD                                     |
|-------|---------|--------------|-----------------------|---------------------------------------------|
| Deer  | Alpha   | ORF1a        | $1.92 \times 10^{-3}$ | $1.64 - 2.19 \times 10^{-3}$                |
| Deer  | Alpha   | ORF1b        | $1.40 \times 10^{-3}$ | $1.12 - 1.67 \times 10^{-3}$                |
| Deer  | Alpha   | S            | $1.38 \times 10^{-3}$ | $1.02 - 1.74 \times 10^{-3}$                |
| Deer  | Alpha   | ORF3-8, E, M | $2.22 \times 10^{-3}$ | $1.73 - 2.77 \times 10^{-3}$                |
| Deer  | Alpha   | N            | $1.30 \times 10^{-3}$ | $7.33 \times 10^{-4} - 1.91 \times 10^{-3}$ |
| Deer  | Delta   | ORF1a        | $1.54 \times 10^{-3}$ | $5.48 - 6.38 \times 10^{-4}$                |
| Deer  | Delta   | ORF1b        | $1.27 \times 10^{-3}$ | $1.08 - 1.45 \times 10^{-3}$                |
| Deer  | Delta   | S            | $1.91 \times 10^{-3}$ | $1.57 - 2.25 \times 10^{-3}$                |
| Deer  | Delta   | ORF3-8, E, M | $2.13 \times 10^{-3}$ | $1.77 - 2.52 \times 10^{-3}$                |
| Deer  | Delta   | N            | $2.03 \times 10^{-3}$ | $1.52 - 2.57 \times 10^{-3}$                |
| Human | Alpha   | ORF1a        | $5.49 \times 10^{-4}$ | $5.00 - 5.99 \times 10^{-4}$                |
| Human | Alpha   | ORF1b        | $4.65 \times 10^{-4}$ | $4.12 - 5.15 \times 10^{-4}$                |
| Human | Alpha   | S            | $6.36 \times 10^{-4}$ | $5.53 - 7.26 \times 10^{-4}$                |
| Human | Alpha   | ORF3-8, E, M | $8.29 \times 10^{-4}$ | $7.26 - 9.43 \times 10^{-4}$                |
| Human | Alpha   | N            | $1.09 \times 10^{-3}$ | $9.04 \times 10^{-4} - 1.30 \times 10^{-3}$ |
| Human | Delta   | ORF1a        | $5.70 \times 10^{-4}$ | $5.31 - 6.09 \times 10^{-4}$                |
| Human | Delta   | ORF1b        | $4.43 \times 10^{-4}$ | $4.06 - 4.80 \times 10^{-4}$                |
| Human | Delta   | S            | $9.40 \times 10^{-4}$ | $8.51 \times 10^{-4} - 1.03 \times 10^{-3}$ |
| Human | Delta   | ORF3-8, E, M | $9.70 \times 10^{-4}$ | $8.76 \times 10^{-4} - 1.06 \times 10^{-3}$ |
| Human | Delta   | N            | $8.76 \times 10^{-4}$ | $7.53 \times 10^{-4} - 1.00 \times 10^{-3}$ |
| Human | Early   | ORF1a        | $1.15 \times 10^{-3}$ | $9.35 \times 10^{-4} - 1.39 \times 10^{-3}$ |
| Human | Early   | ORF1b        | $1.12 \times 10^{-3}$ | $8.81 \times 10^{-4} - 1.38 \times 10^{-3}$ |
| Human | Early   | S            | $1.44 \times 10^{-3}$ | $1.08 - 1.82 \times 10^{-3}$                |
| Human | Early   | ORF3-8, E, M | $1.65 \times 10^{-3}$ | $1.23 - 2.12 \times 10^{-3}$                |

Human

Early

N

$2.06 \times 10^{-3}$

$1.36 - 2.75 \times 10^{-3}$

**Table S6.** dN/dS values for four selected genes estimated with BUSTED. White-tailed deer – dN/dS within transmission clusters. Deer all – dN/dS for all white-tailed deer samples, Human – dN/dS for all human samples in dataset.

|              | Delta    |               |       | Alpha    |               |       |
|--------------|----------|---------------|-------|----------|---------------|-------|
|              | Deer all | Deer clusters | Human | Deer all | Deer clusters | Human |
| <b>N</b>     | 0.77     | 0.94          | 0.69  | 0.25     | 0.29          | 0.78  |
| <b>nsp3</b>  | 0.47     | 0.69          | 0.60  | 0.17     | 0.19          | 0.59  |
| <b>ORF3a</b> | 1.26     | 0.51          | 1.38  | 0.68     | 4.30          | 1.54  |
| <b>S</b>     | 0.40     | 0.65          | 0.84  | 0.38     | 0.46          | 0.57  |

**Table S7.** Prevalence of different types of mutations in white-tailed deer clusters and in humans. For both Alpha and Delta samples counts provided for transmission clusters including branches leading to clusters, and both values for all mutational events and synonymous mutations are provided. Data for human is provided based on states on the UShER phylogenetic tree (see Materials and Methods).

| REF | ALT | Delta Deer |        |     |        | Alpha Deer |        |     |        | Human     |          |           |              |
|-----|-----|------------|--------|-----|--------|------------|--------|-----|--------|-----------|----------|-----------|--------------|
|     |     | Syn        | %(Syn) | All | %(All) | Syn        | %(Syn) | All | %(All) | UShER_all | %(UShER) | UShER_syn | %(UShER_syn) |
| A   | C   | 7          | 3.17   | 4   | 0.92   | 0          | 0.00   | 3   | 0.67   | 77574     | 1.82     | 14112     | 0.82         |
| A   | G   | 0          | 0.00   | 18  | 4.14   | 7          | 2.82   | 19  | 4.22   | 414733    | 9.71     | 156893    | 9.15         |
| A   | T   | 1          | 0.45   | 9   | 2.07   | 3          | 1.21   | 6   | 1.33   | 70454     | 1.65     | 24353     | 1.42         |
| C   | A   | 3          | 1.36   | 11  | 2.53   | 0          | 0.00   | 4   | 0.89   | 108080    | 2.53     | 23273     | 1.36         |
| C   | G   | 1          | 0.45   | 2   | 0.46   | 0          | 0.00   | 3   | 0.67   | 24135     | 0.57     | 6895      | 0.40         |
| C   | T   | 176        | 79.64  | 299 | 68.74  | 202        | 81.45  | 318 | 70.67  | 1903905   | 44.59    | 904026    | 52.70        |
| G   | A   | 6          | 2.71   | 16  | 3.68   | 4          | 1.61   | 19  | 4.22   | 352838    | 8.26     | 96505     | 5.63         |
| G   | C   | 0          | 0.00   | 3   | 0.69   | 0          | 0.00   | 6   | 1.33   | 60632     | 1.42     | 4898      | 0.29         |
| G   | T   | 3          | 1.36   | 27  | 6.21   | 3          | 1.21   | 25  | 5.56   | 580823    | 13.60    | 92853     | 5.41         |
| T   | A   | 2          | 0.90   | 6   | 1.38   | 2          | 0.81   | 6   | 1.33   | 58581     | 1.37     | 29124     | 1.70         |
| T   | C   | 20         | 9.05   | 33  | 7.59   | 27         | 10.89  | 37  | 8.22   | 532552    | 12.47    | 344300    | 20.07        |
| T   | G   | 2          | 0.90   | 7   | 1.61   | 0          | 0.00   | 4   | 0.89   | 85567     | 2.00     | 18169     | 1.06         |

**Table S8.** Representative SARS-CoV-2 viral isolates which were selected for further characterization in vitro and in vivo.

| Lineage                       | Virus Selected                    |
|-------------------------------|-----------------------------------|
| AY.109 Delta (B.1.617.2-like) | hCoV-19/deer/USA/OH-OSU-2169/2021 |
| AY.118 Delta (B.1.617.2-like) | hCoV-19/deer/USA/OH-OSU-1214/2021 |
| AY.3 Delta (B.1.617.2-like)   | hCoV-19/deer/USA/OH-OSU-1265/2021 |
| AY.39 Delta (B.1.617.2-like)  | hCoV-19/deer/USA/OH-OSU-1292/2021 |
| AY.44 Delta (B.1.617.2-like)  | hCoV-19/deer/USA/OH-OSU-1828/2021 |
| AY.75 Delta (B.1.617.2-like)  | hCoV-19/deer/USA/OH-OSU-1744/2021 |
| B.1.1.7 Alpha (B.1.1.7-like)  | hCoV-19/deer/USA/OH-OSU-1338/2021 |
| AY.25 Delta (B.1.617.2-like)  | hCoV-19/deer/USA/OH-OSU-1440/2021 |
| AY.103 Delta (B.1.617.2-like) | hCoV-19/deer/USA/OH-OSU-2158/2021 |

**Table S9.** GenBank accession numbers for consensus sequences and SRA accession numbers for raw sequence read data for 80 white-tailed deer SARS-CoV-2 strains.

| Virus Name                        | Consensus Sequence GenBank Accession | Sequence Read SRA Accession |
|-----------------------------------|--------------------------------------|-----------------------------|
| hCoV-19/deer/USA/OH-OSU-0716/2022 | OQ437913                             | SRR23645831                 |
| hCoV-19/deer/USA/OH-OSU-0735/2022 | OQ437959                             | SRR23645830                 |
| hCoV-19/deer/USA/OH-OSU-0921/2022 | OQ437948                             | SRR23645829                 |
| hCoV-19/deer/USA/OH-OSU-0926/2022 | OQ437923                             | SRR23645828                 |
| hCoV-19/deer/USA/OH-OSU-1099/2021 | OQ437920                             | SRR23645905                 |
| hCoV-19/deer/USA/OH-OSU-1100/2021 | OQ437949                             | SRR23645904                 |
| hCoV-19/deer/USA/OH-OSU-1104/2021 | OQ437932                             | SRR23645893                 |
| hCoV-19/deer/USA/OH-OSU-1106/2021 | OQ437980                             | SRR23645882                 |
| hCoV-19/deer/USA/OH-OSU-1111/2021 | OQ437956                             | SRR23645871                 |
| hCoV-19/deer/USA/OH-OSU-1114/2021 | OQ437984                             | SRR23645860                 |
| hCoV-19/deer/USA/OH-OSU-1144/2021 | OQ437969                             | SRR23645849                 |
| hCoV-19/deer/USA/OH-OSU-1206/2021 | OQ437936                             | SRR23645838                 |
| hCoV-19/deer/USA/OH-OSU-1214/2021 | OQ437978                             | SRR23645827                 |
| hCoV-19/deer/USA/OH-OSU-1243/2021 | OQ437946                             | SRR23645826                 |
| hCoV-19/deer/USA/OH-OSU-1263/2021 | OQ437912                             | SRR23645903                 |
| hCoV-19/deer/USA/OH-OSU-1265/2021 | OQ437930                             | SRR23645902                 |
| hCoV-19/deer/USA/OH-OSU-1271/2021 | OQ437915                             | SRR23645901                 |
| hCoV-19/deer/USA/OH-OSU-1292/2021 | OQ437950                             | SRR23645900                 |
| hCoV-19/deer/USA/OH-OSU-1297/2021 | OQ437990                             | SRR23645899                 |
| hCoV-19/deer/USA/OH-OSU-1331/2021 | OQ437918                             | SRR23645898                 |
| hCoV-19/deer/USA/OH-OSU-1335/2021 | OQ437958                             | SRR23645897                 |
| hCoV-19/deer/USA/OH-OSU-1338/2021 | OQ437928                             | SRR23645896                 |
| hCoV-19/deer/USA/OH-OSU-1403/2021 | OQ437921                             | SRR23645895                 |

|                                   |          |             |
|-----------------------------------|----------|-------------|
| hCoV-19/deer/USA/OH-OSU-1419/2021 | OQ437926 | SRR23645894 |
| hCoV-19/deer/USA/OH-OSU-1429/2021 | OQ437971 | SRR23645892 |
| hCoV-19/deer/USA/OH-OSU-1434/2021 | OQ437922 | SRR23645891 |
| hCoV-19/deer/USA/OH-OSU-1439/2021 | OQ437981 | SRR23645890 |
| hCoV-19/deer/USA/OH-OSU-1440/2021 | OQ437938 | SRR23645889 |
| hCoV-19/deer/USA/OH-OSU-1459/2021 | OQ437960 | SRR23645888 |
| hCoV-19/deer/USA/OH-OSU-1480/2021 | OQ437962 | SRR23645887 |
| hCoV-19/deer/USA/OH-OSU-1490/2021 | OQ437957 | SRR23645886 |
| hCoV-19/deer/USA/OH-OSU-1703/2021 | OQ437988 | SRR23645885 |
| hCoV-19/deer/USA/OH-OSU-1710/2021 | OQ437967 | SRR23645884 |
| hCoV-19/deer/USA/OH-OSU-1720/2021 | OQ437934 | SRR23645883 |
| hCoV-19/deer/USA/OH-OSU-1734/2021 | OQ437929 | SRR23645881 |
| hCoV-19/deer/USA/OH-OSU-1744/2021 | OQ437943 | SRR23645880 |
| hCoV-19/deer/USA/OH-OSU-1756/2021 | OQ437970 | SRR23645879 |
| hCoV-19/deer/USA/OH-OSU-1778/2021 | OQ437974 | SRR23645878 |
| hCoV-19/deer/USA/OH-OSU-1790/2021 | OQ437976 | SRR23645877 |
| hCoV-19/deer/USA/OH-OSU-1793/2021 | OQ437939 | SRR23645876 |
| hCoV-19/deer/USA/OH-OSU-1828/2021 | OQ437961 | SRR23645875 |
| hCoV-19/deer/USA/OH-OSU-1830/2021 | OQ437927 | SRR23645874 |
| hCoV-19/deer/USA/OH-OSU-1833/2021 | OQ437982 | SRR23645873 |
| hCoV-19/deer/USA/OH-OSU-1834/2021 | OQ437985 | SRR23645872 |
| hCoV-19/deer/USA/OH-OSU-1839/2021 | OQ466563 | SRR23645870 |
| hCoV-19/deer/USA/OH-OSU-1842/2021 | OQ437940 | SRR23645869 |
| hCoV-19/deer/USA/OH-OSU-1950/2021 | OQ437977 | SRR23645868 |
| hCoV-19/deer/USA/OH-OSU-1983/2021 | OQ437989 | SRR23645867 |
| hCoV-19/deer/USA/OH-OSU-1985/2021 | OQ437975 | SRR23645866 |
| hCoV-19/deer/USA/OH-OSU-1988/2021 | OQ437983 | SRR23645865 |
| hCoV-19/deer/USA/OH-OSU-2011/2021 | OQ437947 | SRR23645864 |
| hCoV-19/deer/USA/OH-OSU-2016/2021 | OQ437987 | SRR23645863 |
| hCoV-19/deer/USA/OH-OSU-2069/2021 | OQ437979 | SRR23645862 |
| hCoV-19/deer/USA/OH-OSU-2070/2021 | OQ437972 | SRR23645861 |
| hCoV-19/deer/USA/OH-OSU-2072/2021 | OQ449344 | SRR23645859 |
| hCoV-19/deer/USA/OH-OSU-2077/2021 | OQ437945 | SRR23645858 |
| hCoV-19/deer/USA/OH-OSU-2083/2021 | OQ437937 | SRR23645857 |
| hCoV-19/deer/USA/OH-OSU-2084/2021 | OQ437919 | SRR23645856 |
| hCoV-19/deer/USA/OH-OSU-2088/2021 | OQ437917 | SRR23645855 |
| hCoV-19/deer/USA/OH-OSU-2105/2021 | OQ437953 | SRR23645854 |
| hCoV-19/deer/USA/OH-OSU-2111/2021 | OQ437935 | SRR23645853 |
| hCoV-19/deer/USA/OH-OSU-2113/2021 | OQ437951 | SRR23645852 |
| hCoV-19/deer/USA/OH-OSU-2125/2021 | OQ437942 | SRR23645851 |
| hCoV-19/deer/USA/OH-OSU-2126/2021 | OQ437944 | SRR23645850 |

|                                   |          |             |
|-----------------------------------|----------|-------------|
| hCoV-19/deer/USA/OH-OSU-2152/2021 | OQ449343 | SRR23645848 |
| hCoV-19/deer/USA/OH-OSU-2153/2021 | OQ437986 | SRR23645847 |
| hCoV-19/deer/USA/OH-OSU-2156/2021 | OQ437924 | SRR23645846 |
| hCoV-19/deer/USA/OH-OSU-2158/2021 | OQ437925 | SRR23645845 |
| hCoV-19/deer/USA/OH-OSU-2169/2021 | OQ437941 | SRR23645844 |
| hCoV-19/deer/USA/OH-OSU-2184/2021 | OQ437914 | SRR23645843 |
| hCoV-19/deer/USA/OH-OSU-2222/2021 | OQ437954 | SRR23645842 |
| hCoV-19/deer/USA/OH-OSU-2249/2021 | OQ437963 | SRR23645841 |
| hCoV-19/deer/USA/OH-OSU-2253/2021 | OQ437952 | SRR23645840 |
| hCoV-19/deer/USA/OH-OSU-2306/2021 | OQ437955 | SRR23645839 |
| hCoV-19/deer/USA/OH-OSU-2307/2021 | OQ437916 | SRR23645837 |
| hCoV-19/deer/USA/OH-OSU-2320/2021 | OQ437933 | SRR23645836 |
| hCoV-19/deer/USA/OH-OSU-2323/2021 | OQ437968 | SRR23645835 |
| hCoV-19/deer/USA/OH-OSU-2324/2021 | OQ437973 | SRR23645834 |
| hCoV-19/deer/USA/OH-OSU-2326/2021 | OQ437964 | SRR23645833 |
| hCoV-19/deer/USA/OH-OSU-2327/2021 | OQ437931 | SRR23645832 |

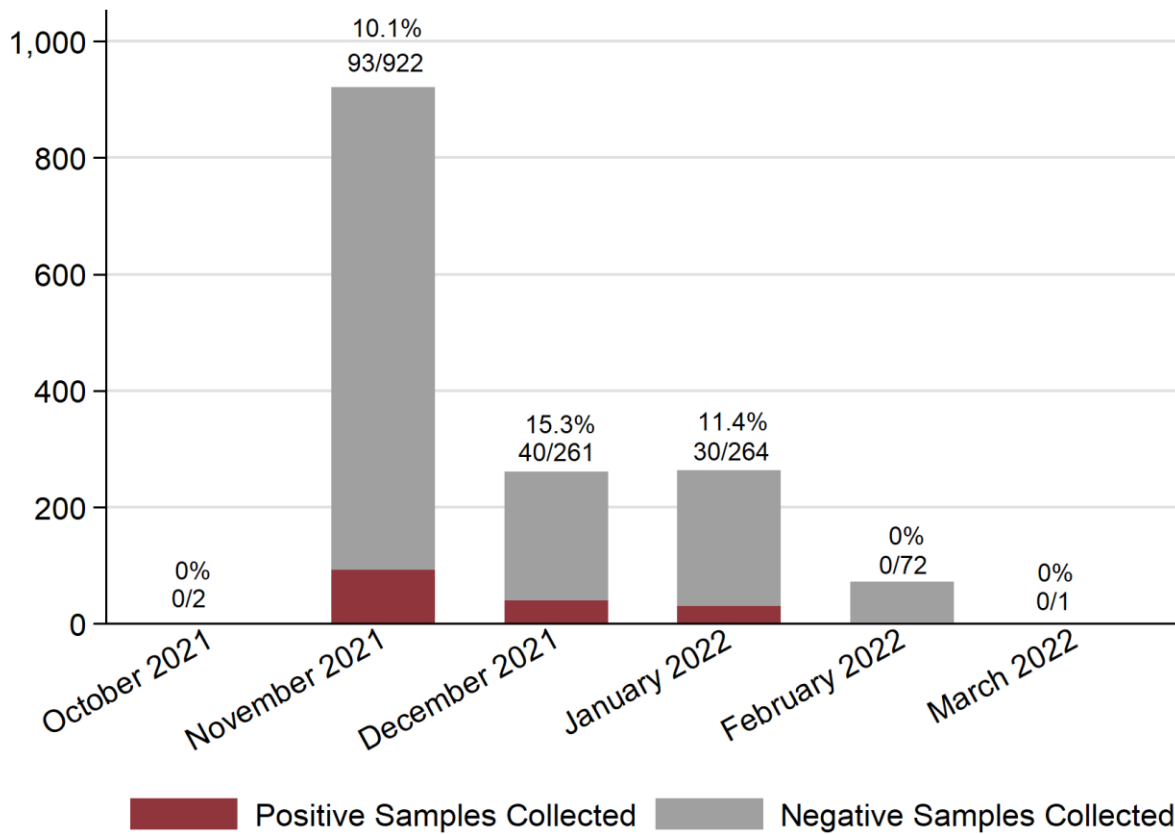

**Figure S1.** Number of nasal swabs collected from white-tailed deer is shown by month of collection with rRT-PCR positive samples shown in red and negative samples in gray. Number of positive samples and total sample size for each month is indicated above each bar along with estimated SARS-CoV-2 prevalence.

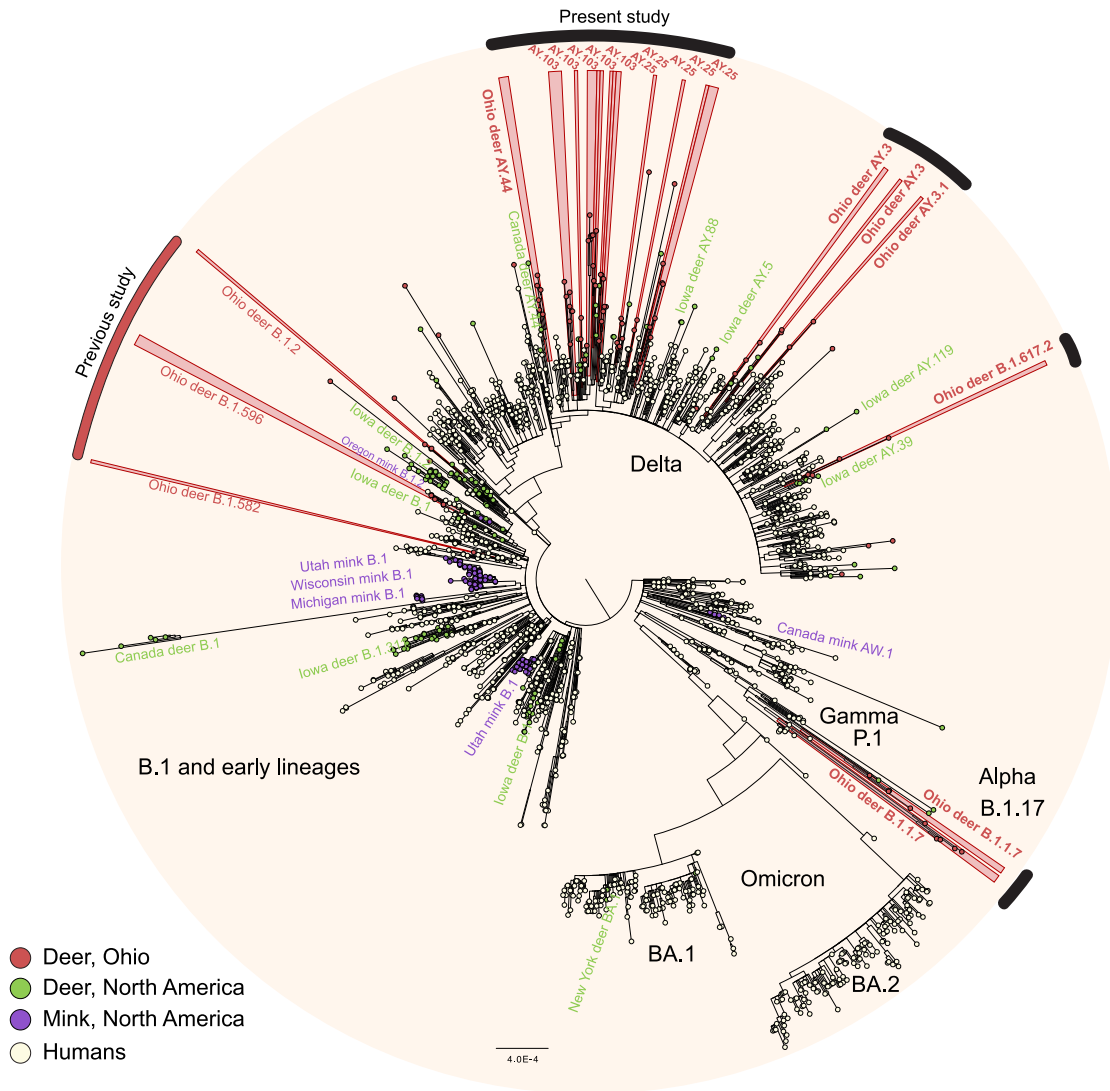

**Figure S2. Maximum likelihood phylogenetic tree of SARS-CoV-2 in humans, mink, and white-tailed deer in North America.** Tips (circles) are shaded by host species and location. Viruses from white-tailed deer in Ohio (red circles) are labeled to indicate whether they were collected from our previous study (B.1.2, B.1.596, and B.1.582) or the present study (delta and alpha).



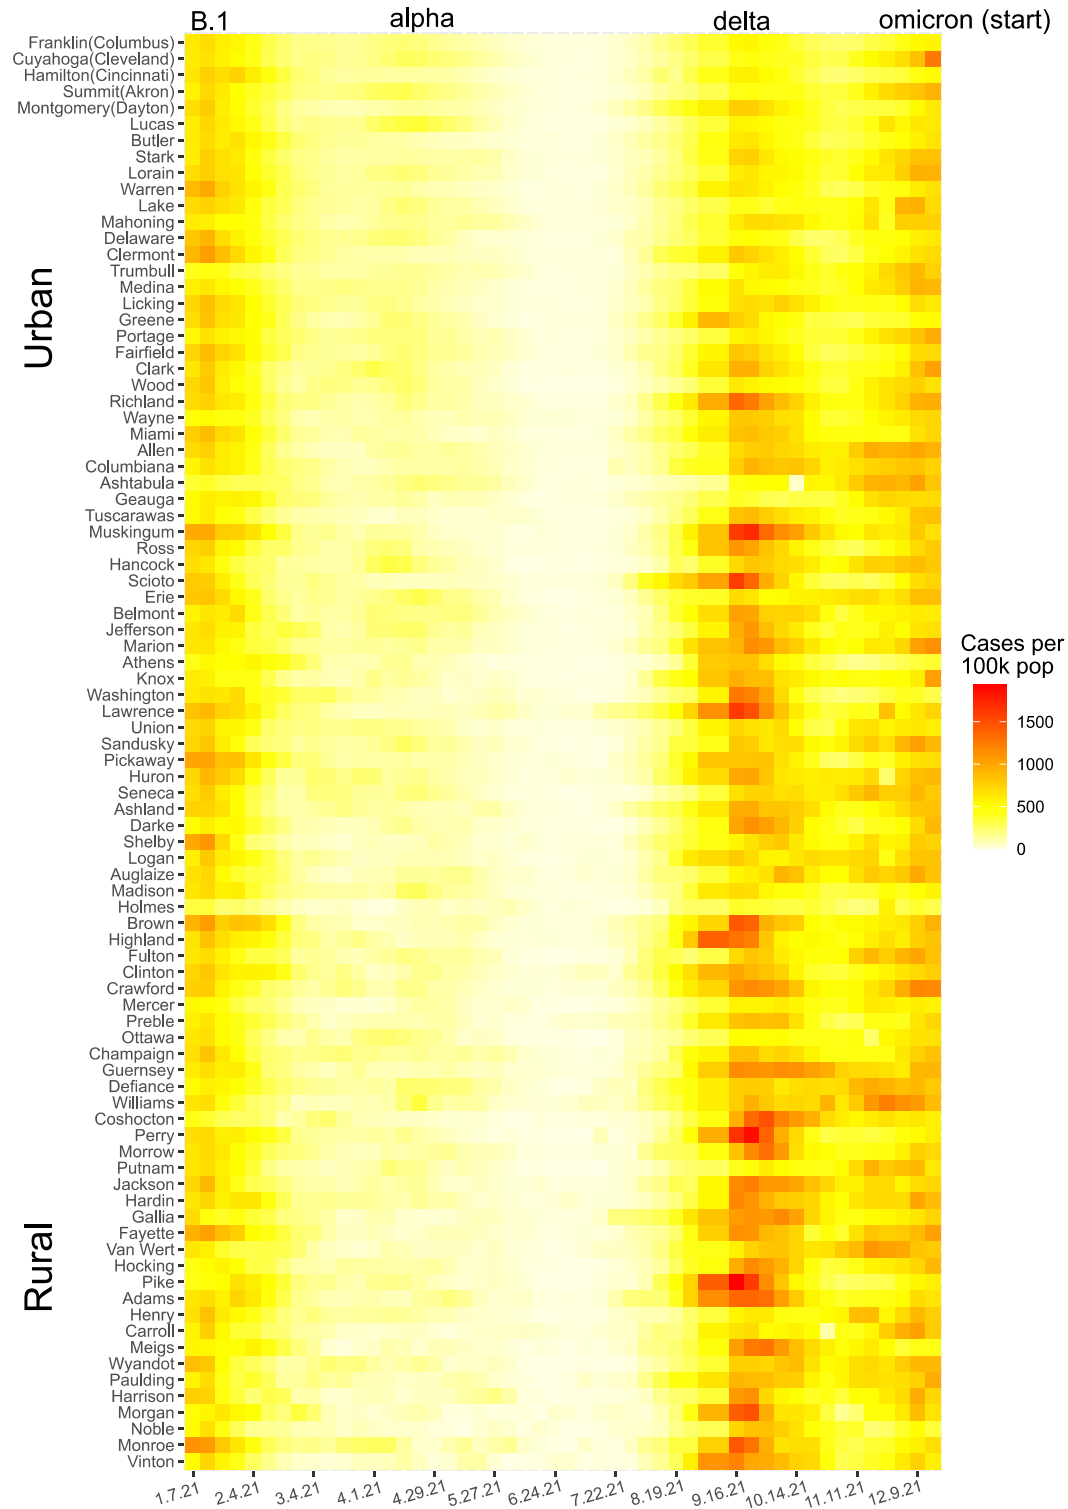

**Figure S3. Heat map of human COVID-19 cases over time and space in Ohio.** For each Ohio county (y-axis), the number of COVID-19 cases per 100,000 population is indicated over time (weekly, x-axis) by the shade of the box (red = high, white = low). Ohio counties listed on the y-axis are ordered by population size, from the largest, most urban counties (top) to the smallest, most rural counties (bottom).

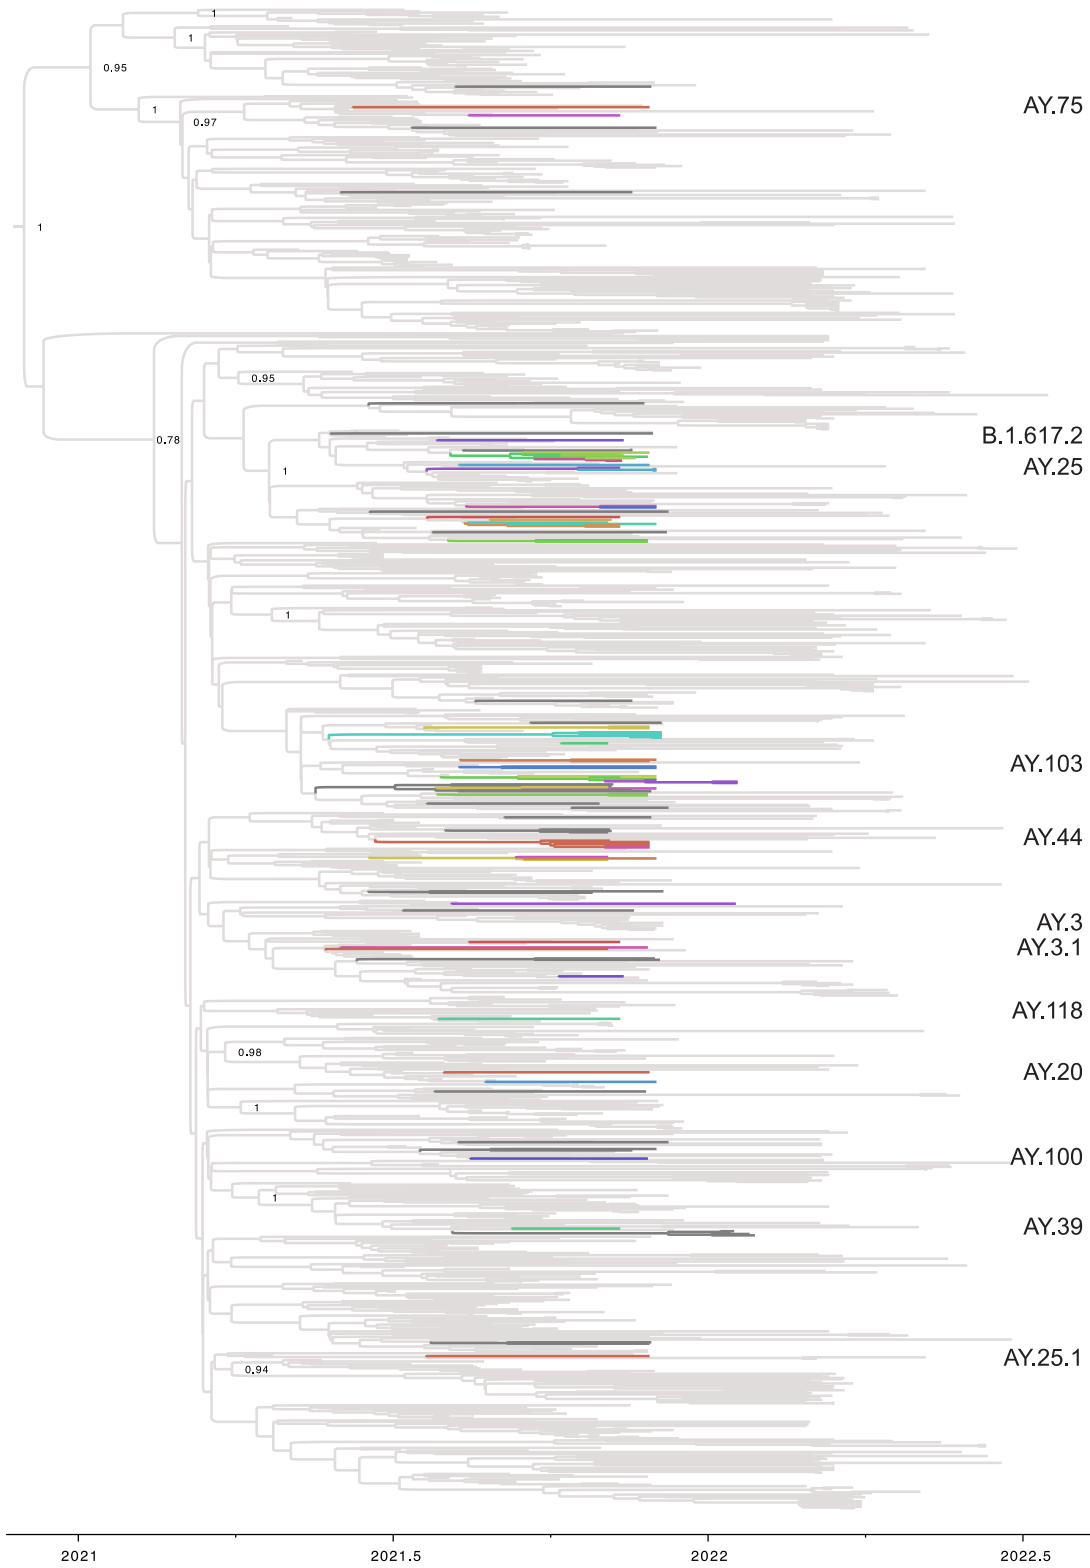

**Figure S4. Time-scaled MCC tree inferred for delta variant viruses in humans and white-tailed deer in Ohio.** Branches shaded by host species: gray = human, dark gray = deer from outside Ohio, colored branches = Ohio deer. Ohio deer branches are colored by county. Posterior probabilities are provided for

key nodes. PANGO lineages for Ohio deer viruses are listed. Raw tree file is available in GitHub repository.

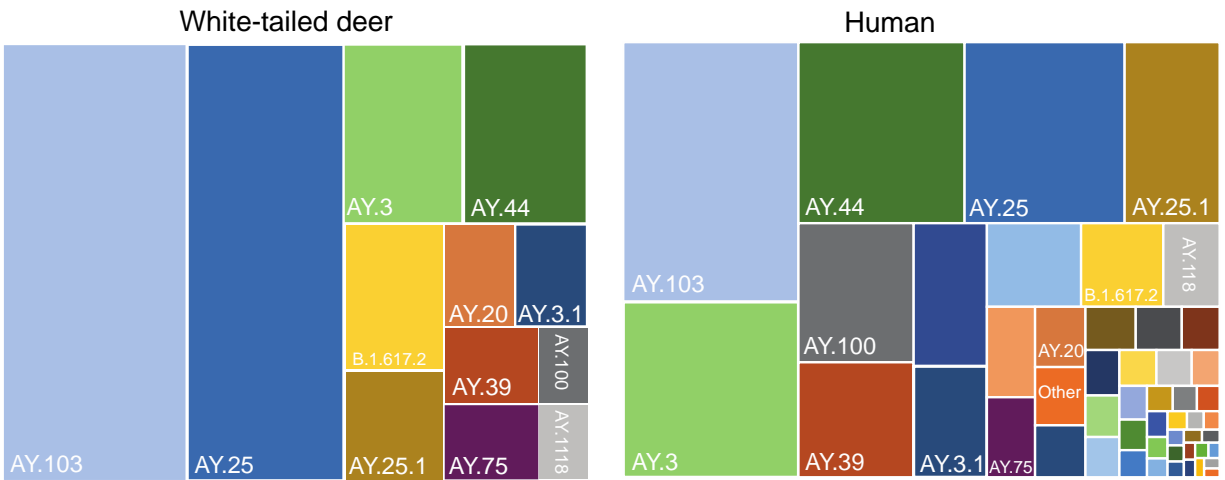

**Figure S5. Dominant delta variant lineages in humans and white-tailed deer in Ohio.** The size of the box is proportional to the number of viruses belonging to the Pango lineage in white-tailed deer (left) and humans (right) in Ohio.

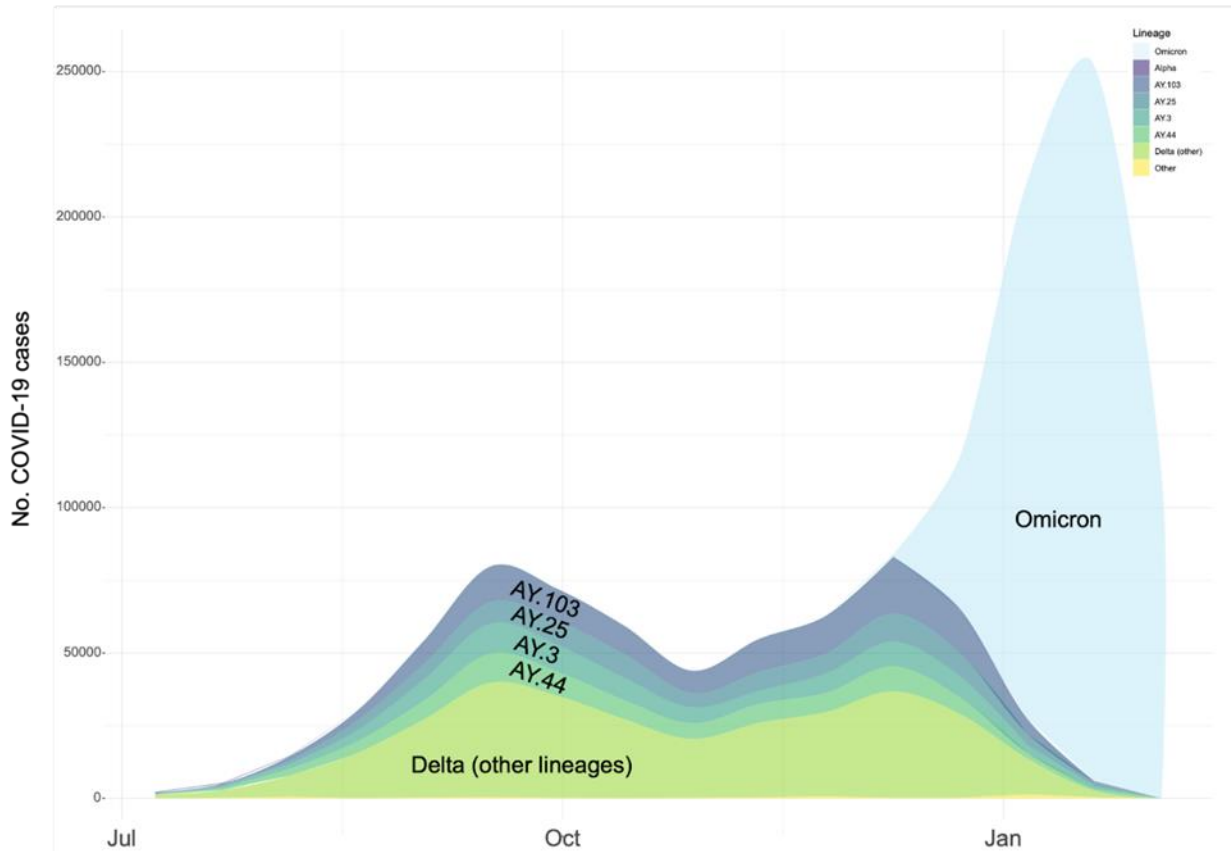

**Fig S6. Co-circulation of delta variant lineages in humans in Ohio.** The number of weekly COVID-19 cases in humans from July 1, 2021 to Jan 22, 2022. Shading indicates the proportion of 22,200 sequenced human viruses in Ohio, categorized as collected for “baseline surveillance,” that belong to one of the four dominant AY lineages of the delta variant, omicron, or one of the other lineages of the delta variant.

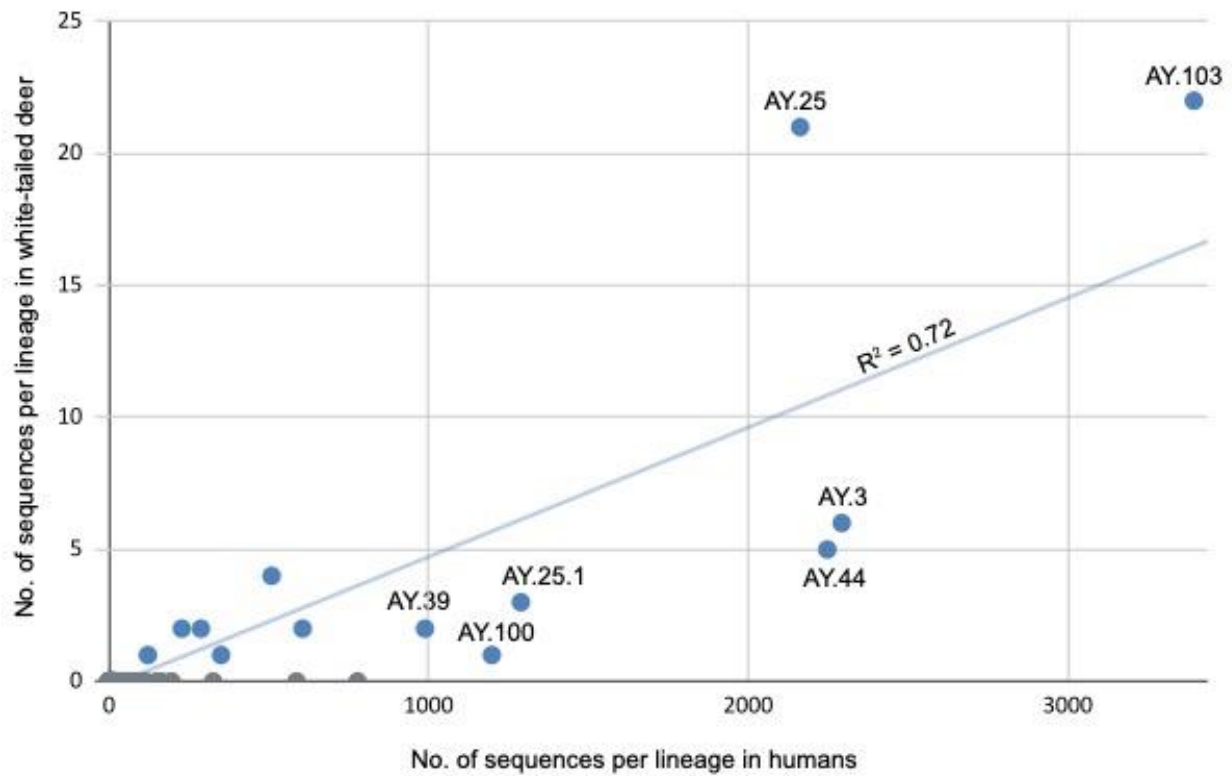

**Figure S7. Plot of delta variant lineage frequency in humans and white-tailed deer in Ohio.** The x-axis represents the number of sequences from SARS-CoV-2 viruses collected in humans in Ohio that belong to AY PANGO lineages. The y-axis represents the number of sequences from SARS-CoV-2 viruses collected in deer in Ohio for this study that belong to AY PANGO lineages.

|            |            | Week      |           |           |                  |                     |        |    |    |    |   |   | Total    |   |
|------------|------------|-----------|-----------|-----------|------------------|---------------------|--------|----|----|----|---|---|----------|---|
|            |            | 44        | 45        | 46        | 47               | 48                  | 49     | 50 | 51 | 52 | 1 | 2 |          | 3 |
| Cincinnati | Brown      |           | B.1.1.7   |           |                  | AY.103<br>B.1.617.2 |        |    |    |    |   |   |          | 3 |
|            | Clermont   | AY.39/103 |           |           |                  | AY.103              |        |    |    |    |   |   |          | 2 |
|            | Warren     | B.1.617.2 |           |           |                  | AY.103              |        |    |    |    |   |   |          | 2 |
| Cleveland  | Erie       |           |           | AY.25     |                  |                     |        |    |    |    |   |   |          | 1 |
|            | Huron      |           | AY.25     |           |                  | AY.25               |        |    |    |    |   |   |          | 1 |
|            | Medina     |           |           |           |                  | AY.25               |        |    |    |    |   |   |          | 1 |
|            | Summit     |           | AY.25     |           |                  |                     |        |    |    |    |   |   | AY.3/103 | 3 |
|            | Tuscarawas |           |           |           |                  | AY.103              |        |    |    |    |   |   |          | 1 |
| Columbus   | Fairfield  |           |           |           |                  | AY.25/103           |        |    |    |    |   |   |          | 2 |
|            | Hocking    |           |           |           |                  | AY.25               |        |    |    |    |   |   |          | 1 |
|            | Knox       |           | AY.118    |           |                  |                     |        |    |    |    |   |   |          | 1 |
|            | Licking    |           | B.1.617.2 |           |                  |                     |        |    |    |    |   |   |          | 1 |
|            | Logan      |           |           |           |                  | AY.25               |        |    |    |    |   |   |          | 1 |
|            | Madison    | AY.25     |           |           |                  |                     |        |    |    |    |   |   |          | 1 |
|            | Perry      |           |           |           |                  | AY.100              |        |    |    |    |   |   |          | 1 |
|            | Pickaway   |           | B.1.1.7   |           |                  |                     |        |    |    |    |   |   |          | 1 |
| Dayton     | Champaign  |           | AY.25     |           |                  |                     |        |    |    |    |   |   |          | 1 |
|            | Clark      |           | AY.25     |           |                  |                     |        |    |    |    |   |   |          | 1 |
|            | Miami      |           |           |           |                  | AY.103              |        |    |    |    |   |   |          | 1 |
| Toledo     | Lucas      |           |           |           |                  |                     | AY.103 |    |    |    |   |   |          | 1 |
|            | Sandusky   |           |           | AY.3      |                  |                     |        |    |    |    |   |   |          | 1 |
|            | Seneca     |           |           | B.1.617.2 |                  |                     |        |    |    |    |   |   |          | 1 |
|            | Adams      |           | AY.25/3   |           |                  |                     |        |    |    |    |   |   |          | 2 |
|            | Athens     | AY.3.1/44 |           |           |                  | AY.20/25.1/44/75    |        |    |    |    |   |   |          | 5 |
|            | Columbiana |           |           |           |                  | AY.103              |        |    |    |    |   |   |          | 1 |
|            | Crawford   |           |           |           | AY.25            | AY.25               |        |    |    |    |   |   |          | 1 |
|            | Harrison   |           | AY.103    |           |                  | AY.103              |        |    |    |    |   |   |          | 1 |
|            | Highland   |           | B.1.1.7   |           |                  | AY.109<br>B.1.1.7   |        |    |    |    |   |   |          | 2 |
|            | Jackson    | AY.103    | AY.39     |           |                  |                     |        |    |    |    |   |   |          | 2 |
|            | Meigs      |           |           |           |                  | AY.20<br>B.1.1.7    |        |    |    |    |   |   |          | 2 |
|            | Noble      |           |           |           |                  | AY.25.1             |        |    |    |    |   |   |          | 1 |
|            | Vinton     |           | AY.75     |           |                  |                     |        |    |    |    |   |   |          | 1 |
| Washington |            |           |           |           | AY.25.1/3/3.1/44 |                     |        |    |    |    |   |   | 4        |   |
| Wyandot    |            | AY.25     |           |           |                  |                     |        |    |    |    |   |   | 1        |   |

**Figure S8. Co-circulation of SARS-CoV-2 lineages in Ohio white-tailed deer by week and county.**

SARS-CoV-2 lineages identified in white-tailed deer per county per week (week 44 begins November 1, 2021). Counties located within that larger metropolitan areas are listed first, followed by rural counties.

A

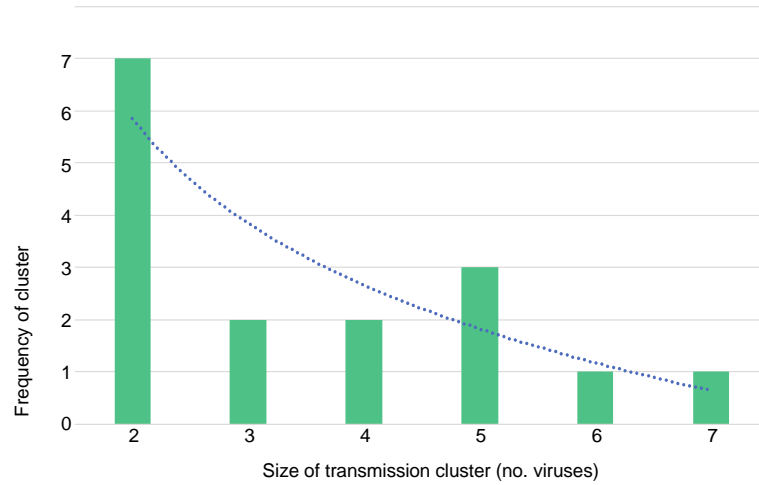

B

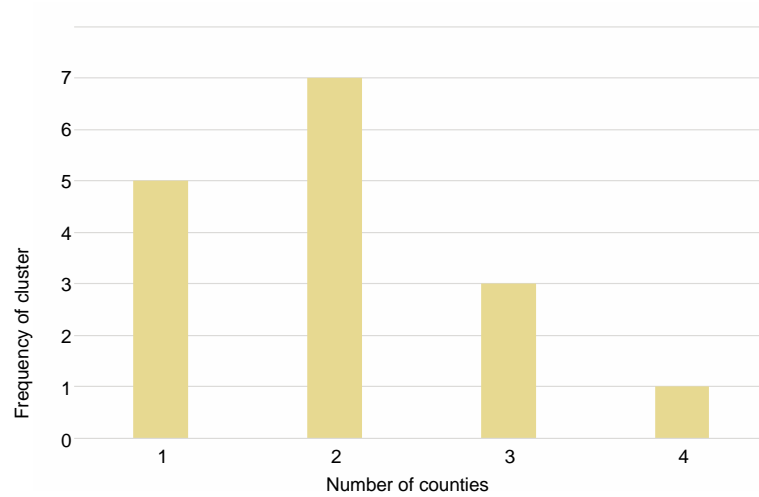

**Figure S9. Size of white-tailed deer transmission clusters.** (A) The frequency of deer transmission clusters of different sizes (minimum size = 2 viruses; maximum size = 7 viruses) is presented on the y-axis. (B) The frequency of deer transmission clusters spanning different numbers of counties (minimum size = 1 county; maximum size = 4 counties).

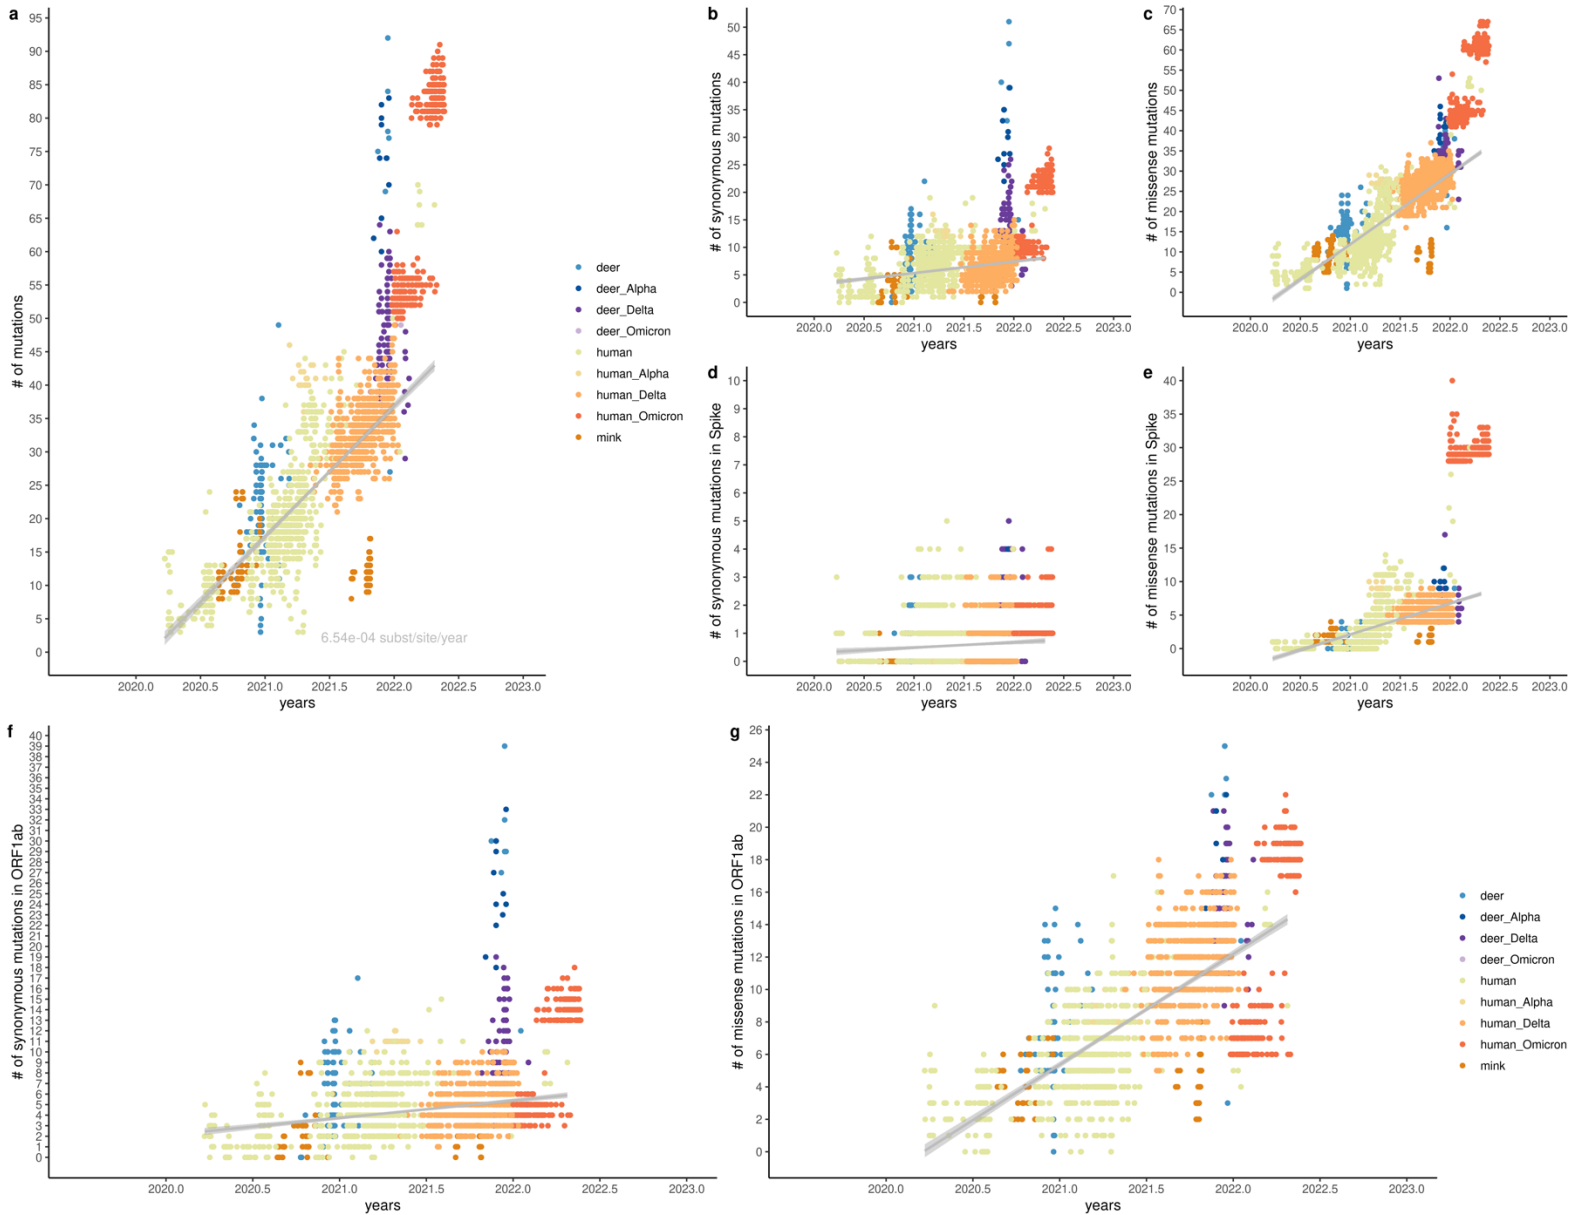

**Figure S10. Root-to-tip regression for the global SARS-CoV-2 dataset in humans, mink, and white-tailed deer in North America.** Each plot shows the number of mutations accumulated from root to leaves versus collection date of leaves. Each point (representing one leaf on the phylogenetic tree) colored by the category it belongs to: white-tailed deer samples from either alpha (dark blue), delta (purple) or omicron(violet) VOCs or other lineages (light blue), human samples from alpha (dark green), delta (light orange) or omicron (dark orange) or other lineages (light green), or mink samples (orange). (a) number of all mutations in the whole genome, (b) only synonymous mutations and (c) missense mutations. Separately we considered synonymous and missense mutations in Spike (d, e) and ORF1ab (f, g). The state at each node on the global ML tree (Figure S2) was reconstructed with TreeTime.



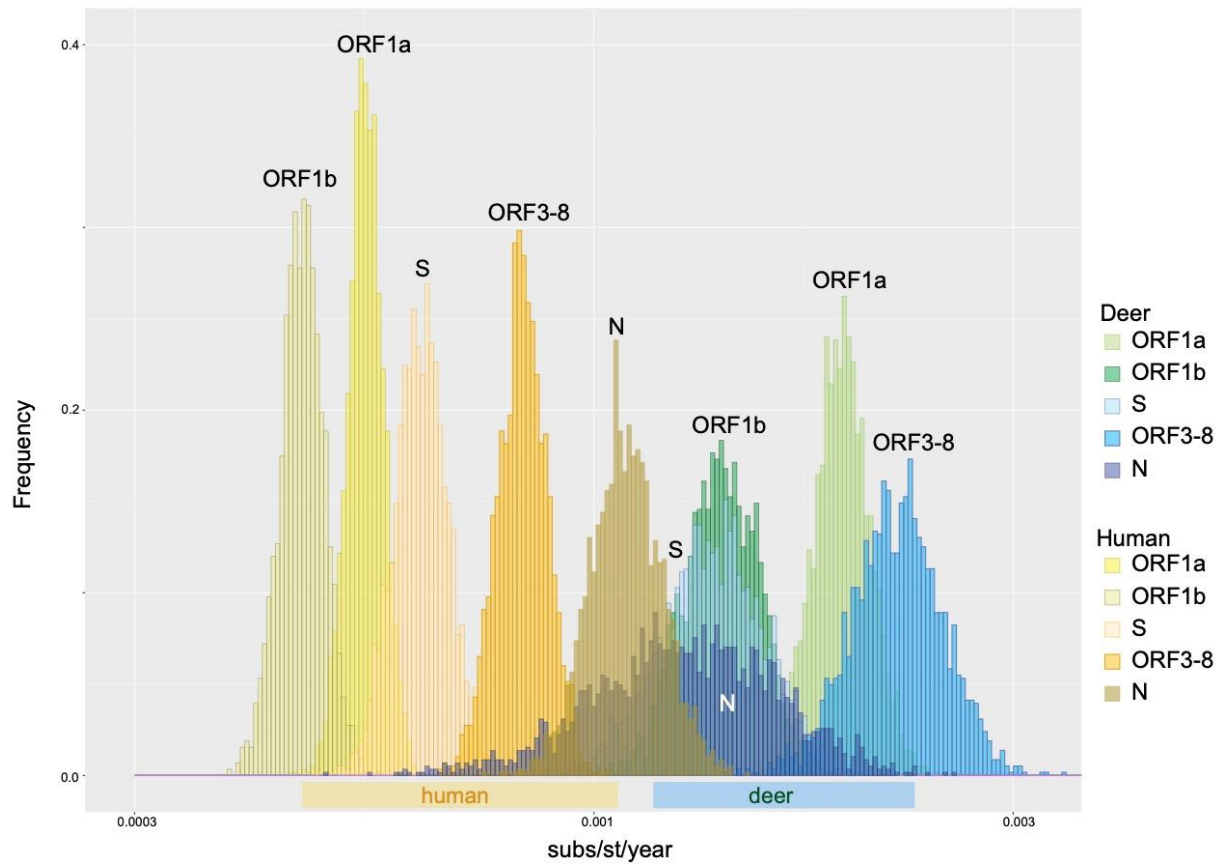

**Figure S11. Evolutionary rates of alpha in humans and white-tailed deer.** The posterior distributions of evolutionary rates (substitutions per site per year) for five partitions of the SARS-CoV-2 genome (ORF1a, ORF1b, ORF3 – ORF8, spike (S), and nucleocapsid (N)) are presented for human (yellow/brown shades) and white-tailed deer (green/blue shades) for the alpha variant. Similar plot for delta variant is available in Figure 4C.

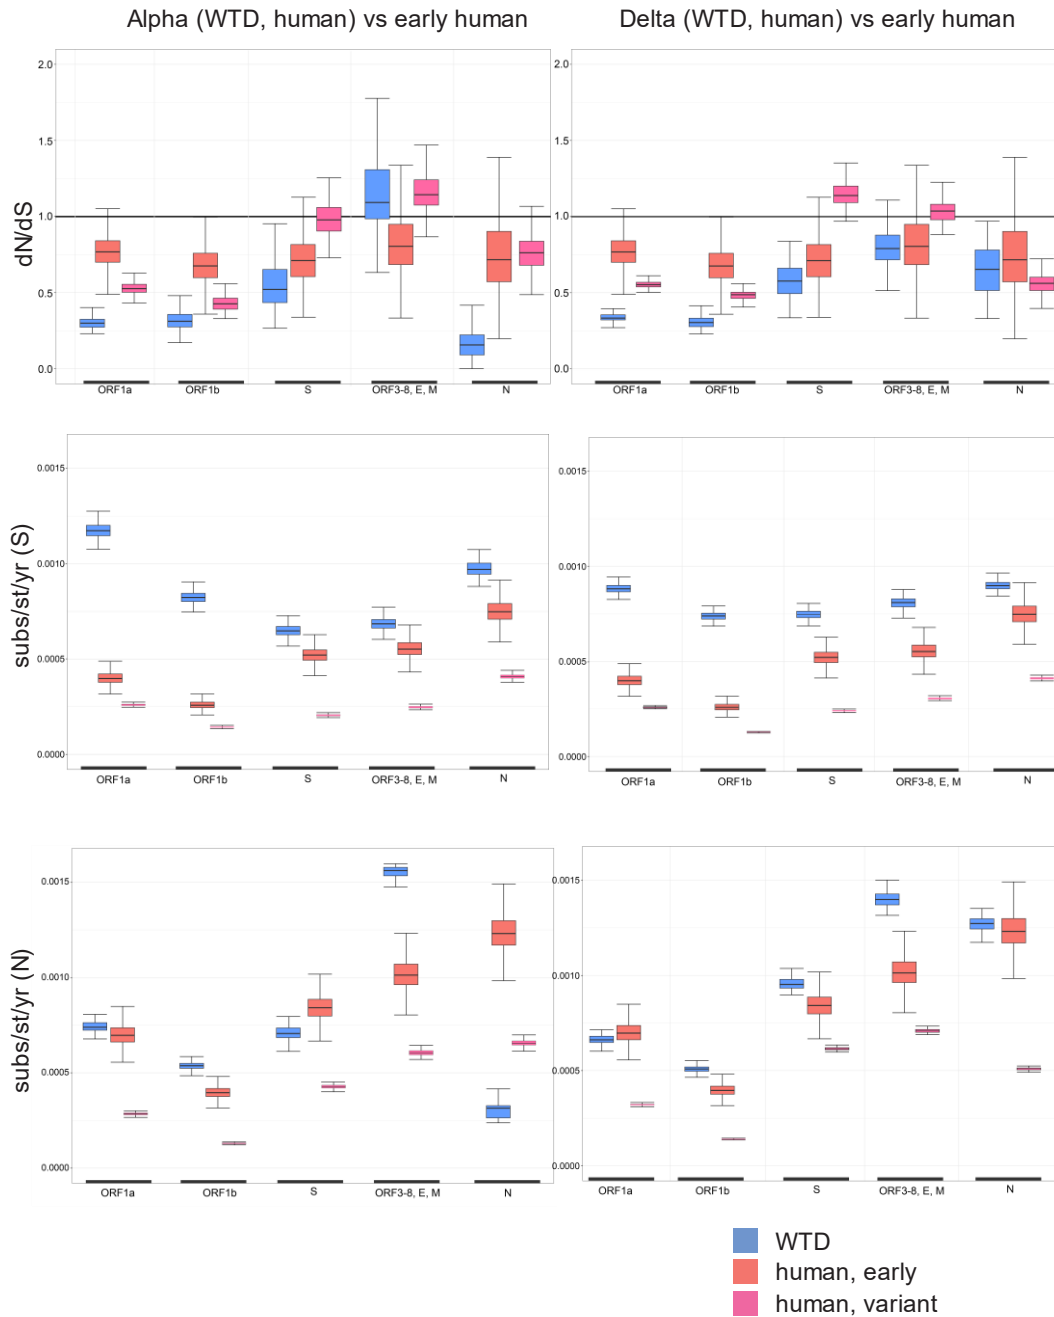

**Figure S12. Rates of synonymous and non-synonymous substitution for alpha and delta variants in humans and white-tailed deer.** The ratio of non-synonymous to synonymous substitution rates ( $dN/dS$ ) is presented for the alpha (left column,  $n = 786$ ) and delta (right column,  $n = 1094$ ) variants for deer (blue boxes) and humans (pink boxes), as well as 786 early strains of SARS-CoV-2 in humans from Pekar et al.<sup>1</sup> Data is presented for five genome partitions: open reading frame 1a, open reading frame 1b, spike protein, open reading frames 3-8 with envelope and membrane proteins, and nucleocapsid. Whisker plots present the mean value, upper and lower quartiles, and minimum and maximum. A black line where  $dN/dS = 1$  indicates the threshold between positive and purifying selection. Synonymous substitutions (S) per site per year is presented in the middle row and non-synonymous substitutions (N) per site per year is presented in the lowest row.

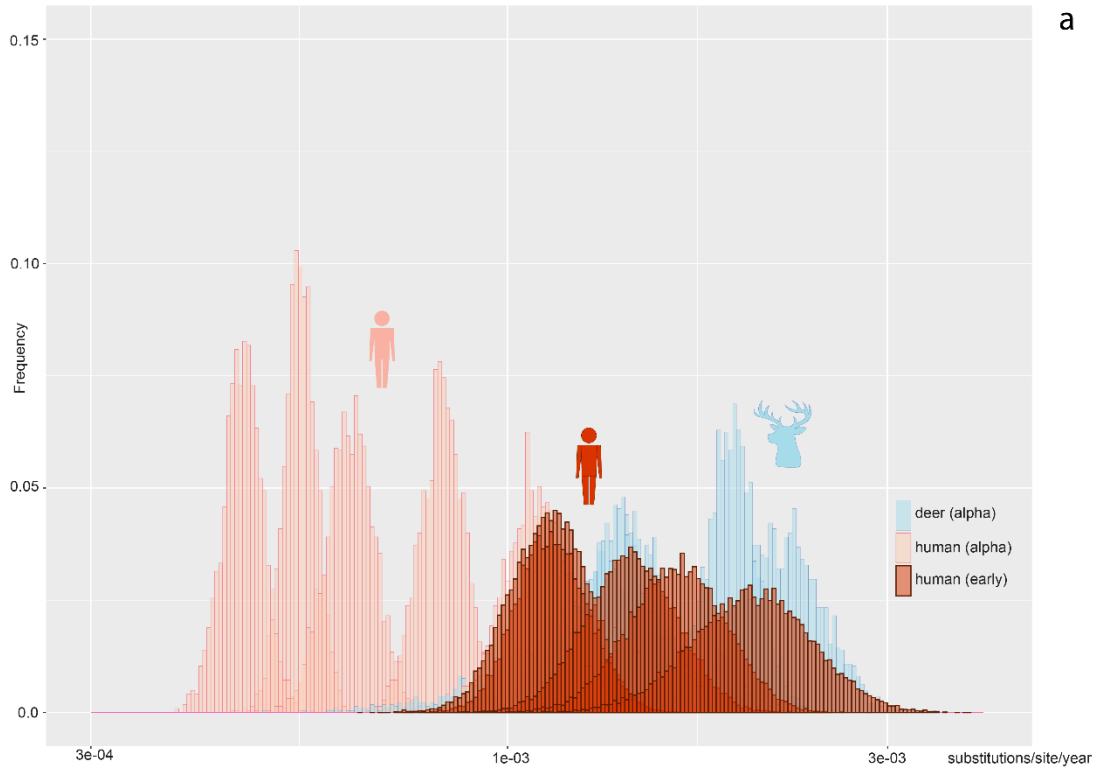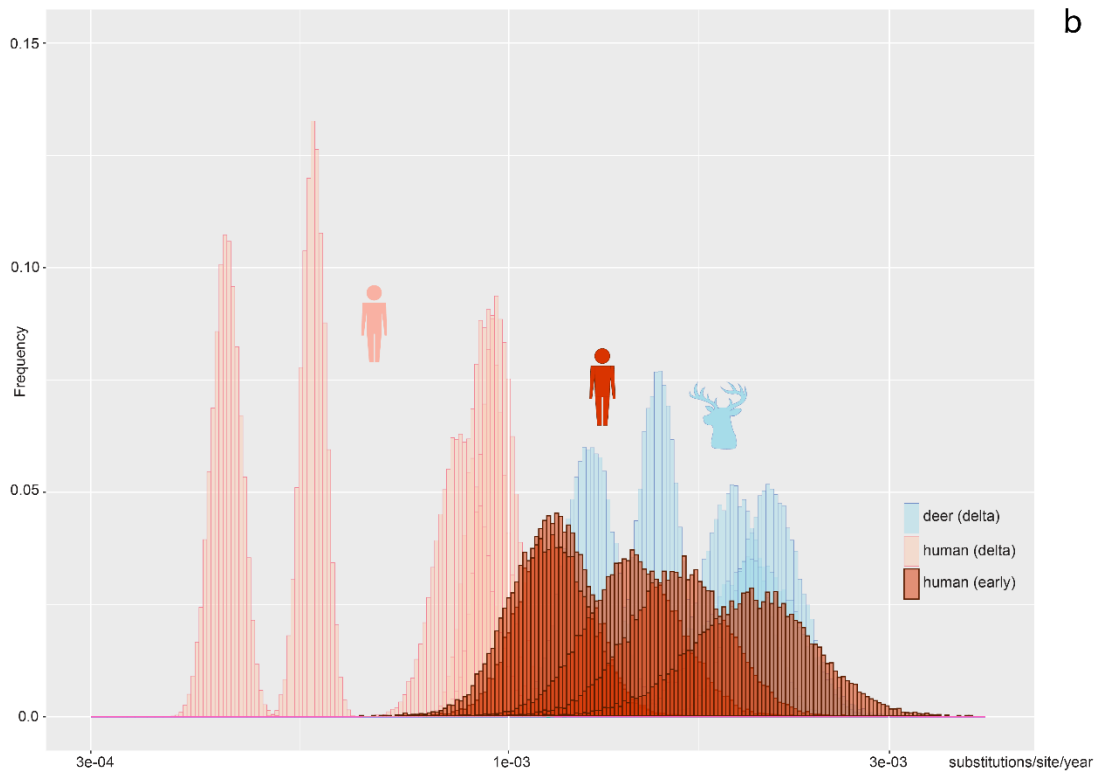

**Figure S13. Evolutionary rates during early phase of SARS-CoV-2 outbreak in humans.** The posterior distributions of evolutionary rates (substitutions per site per year) for five partitions of the SARS-CoV-2 genome (ORF1a, ORF1b, ORF3 – ORF8, spike (S), and nucleocapsid (N)) are presented for three datasets: variant in white-tailed deer (blue); variant in humans (pink); and 786 early strains of SARS-CoV-

2 in humans from Pekar et al.<sup>1</sup> Alpha is presented above (n = 786) and delta below (n = 1094). Similar plots are available for variant data only (human vs. deer) for the alpha variant (Figure S11) and delta variant (Figure 4C). Mean values and 95% HPD are available for each partition and dataset in Table S5.





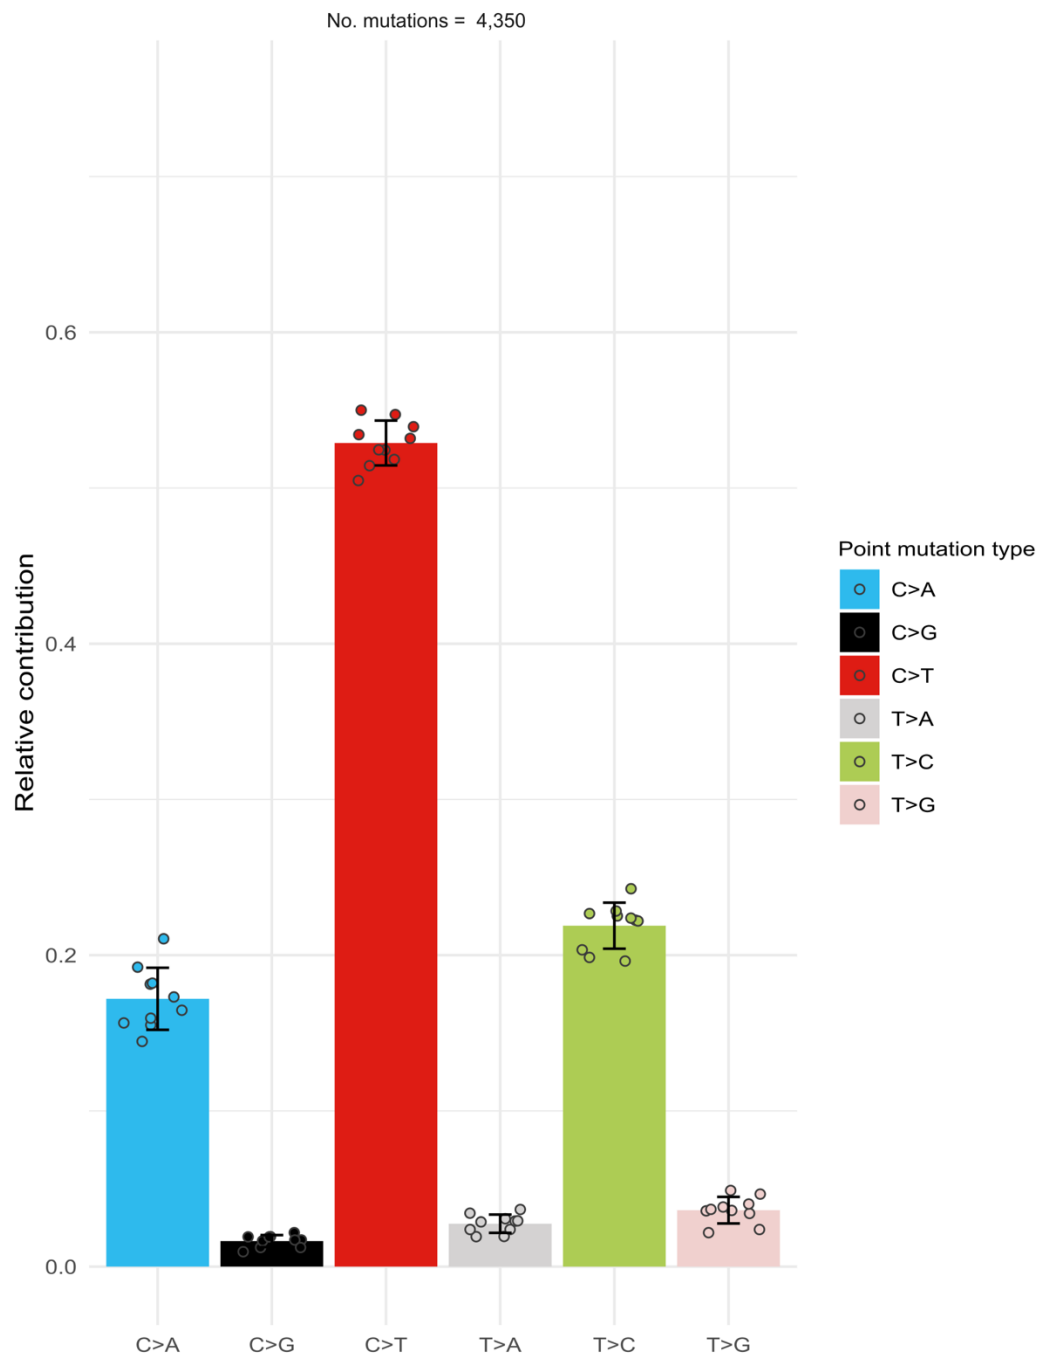

**Figure S16. Low variability of mutational spectrum in humans.** To test whether the elevated C-to-T rate could be explained by high variability in the white-tailed deer mutation spectrum arising from a small deer sample size, 10 random subsamples of the same size as the delta white-tailed deer dataset (435 mutations each) were selected to estimate spectrum variability, with whiskers indicating standard deviation.

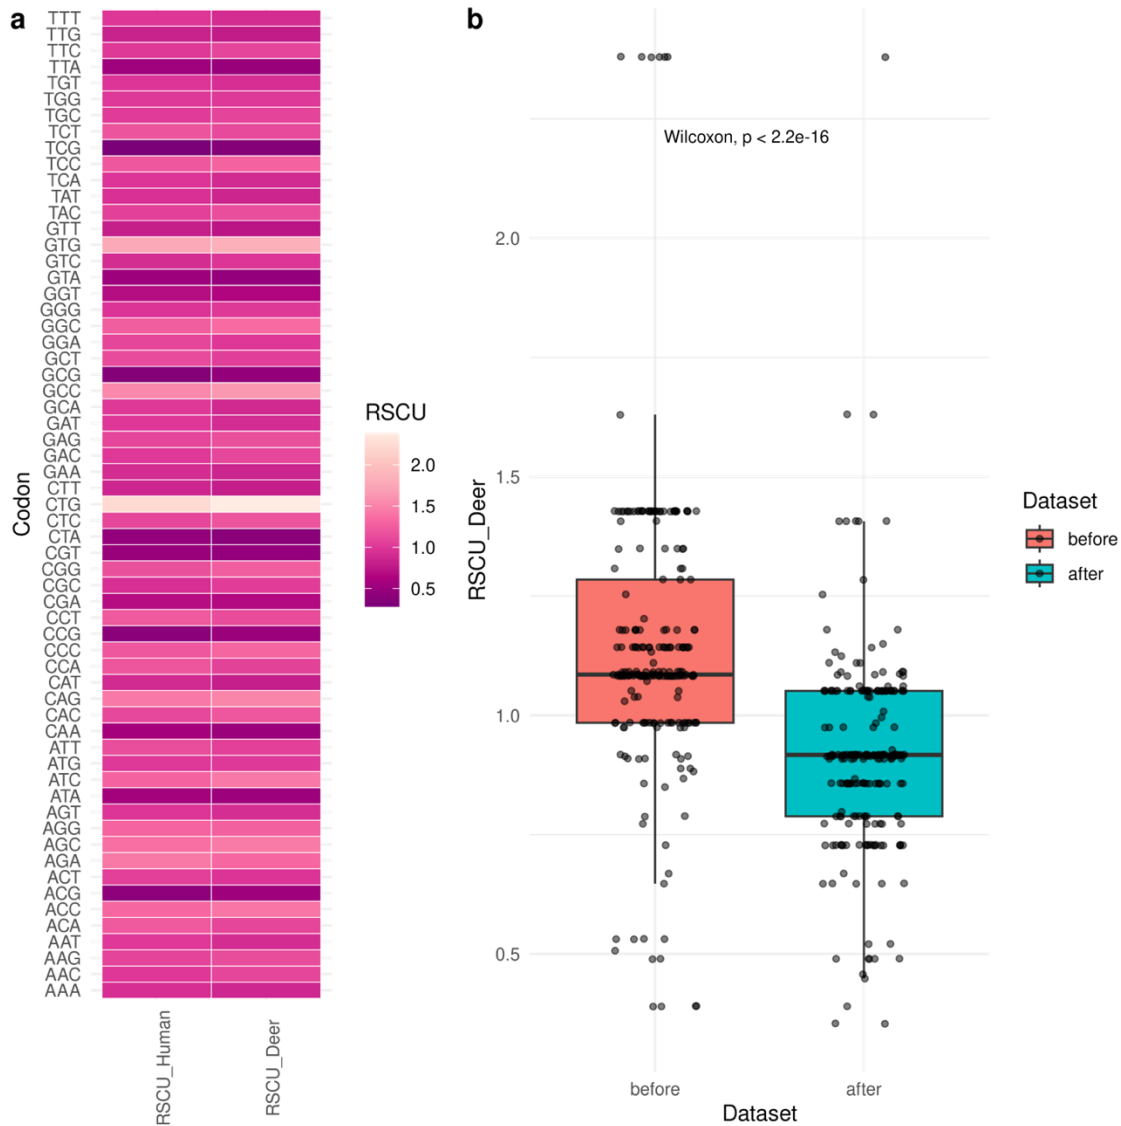

**Figure S17. Codon bias in white-tailed deer calculated for synonymous substitutions in Delta white-tailed deer clusters.** (a) Comparison of relative synonymous codon usage (RSCU) in human and white-tailed deer. (b) Changes in codon RSCU by introduction of mutation. Distribution of RSCU values in ancestral codons ( $n=221$ ) (before mutation was introduced) are shown in coral and after – in cyan. Box midlines indicate the median, the box limits show the 75<sup>th</sup> and 25<sup>th</sup> quartiles, and the whiskers show the distribution range. RSCU calculated as described in Sharp et al.<sup>2</sup> Information on codon usage in white-tailed deer and humans was obtained from CoCoPUTS database ([https://dnahive.fda.gov/dna.cgi?cmd=codon\\_usage&id=537&mode=cocoputs](https://dnahive.fda.gov/dna.cgi?cmd=codon_usage&id=537&mode=cocoputs)).



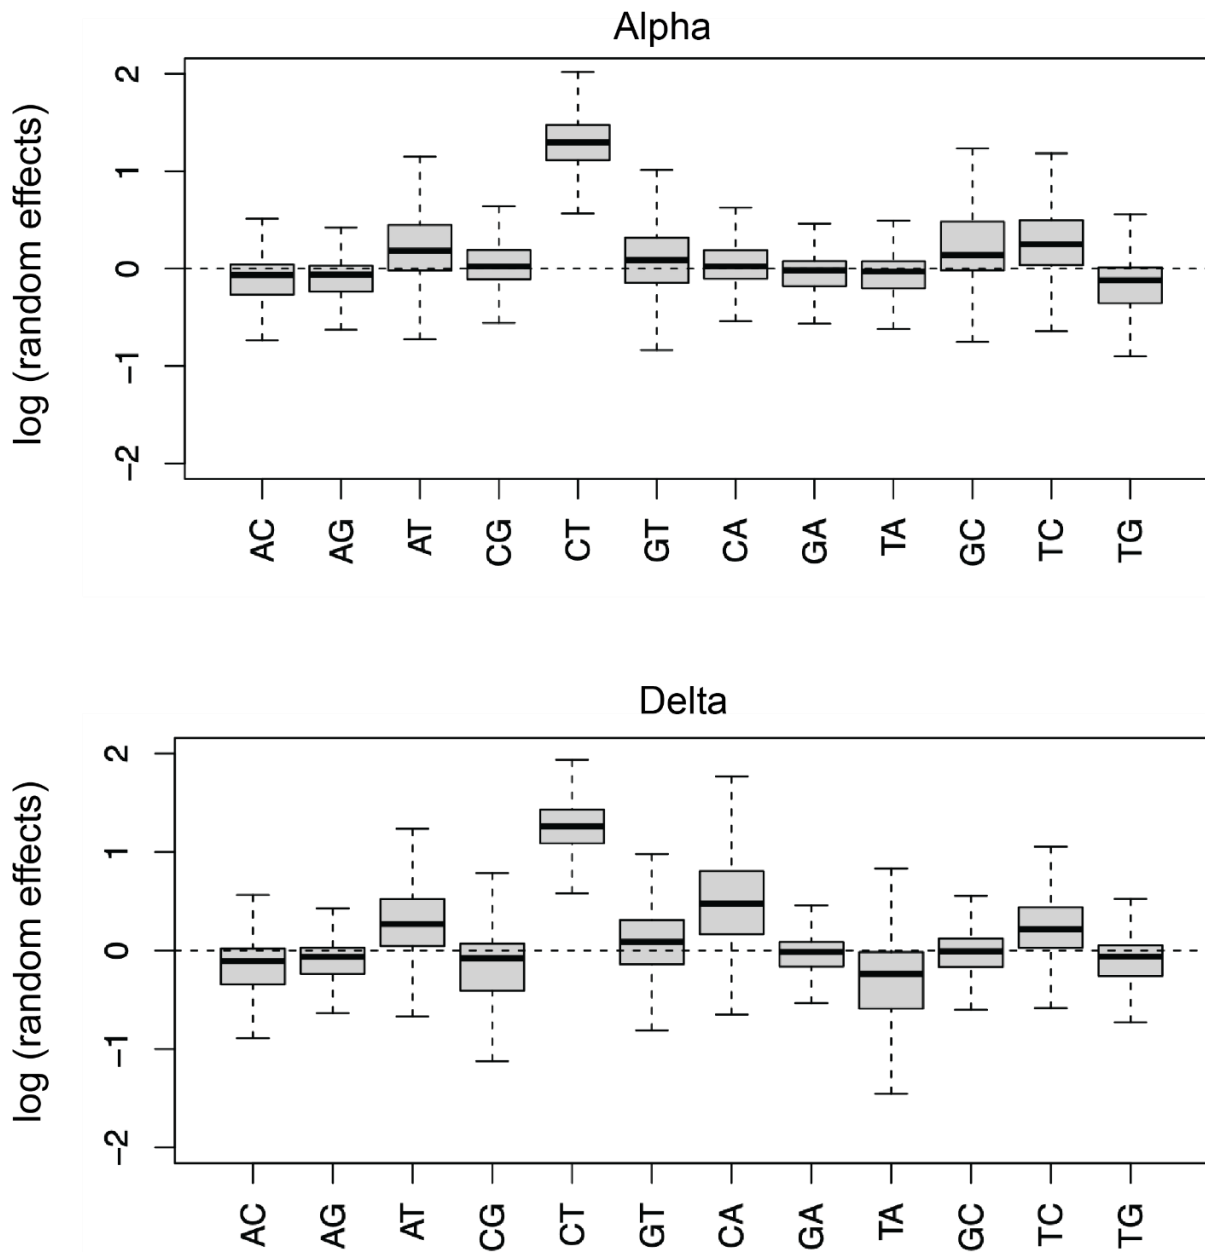

**Figure S18. SARS-CoV-2 substitution rates (WTD-to-early human ratio).** The log deviation (random-effect) from HKY model relative rates is presented for the ratio of deer viruses (alpha, above,  $n = 786$ , and delta, below,  $n = 1094$ ) compared to a dataset of 786 early human SARS-CoV-2 viruses from Pekar et al.<sup>1</sup> Box midlines indicate the median, the box limits show the upper and lower quartiles, and the whiskers extend to 1.5 times the interquartile range.

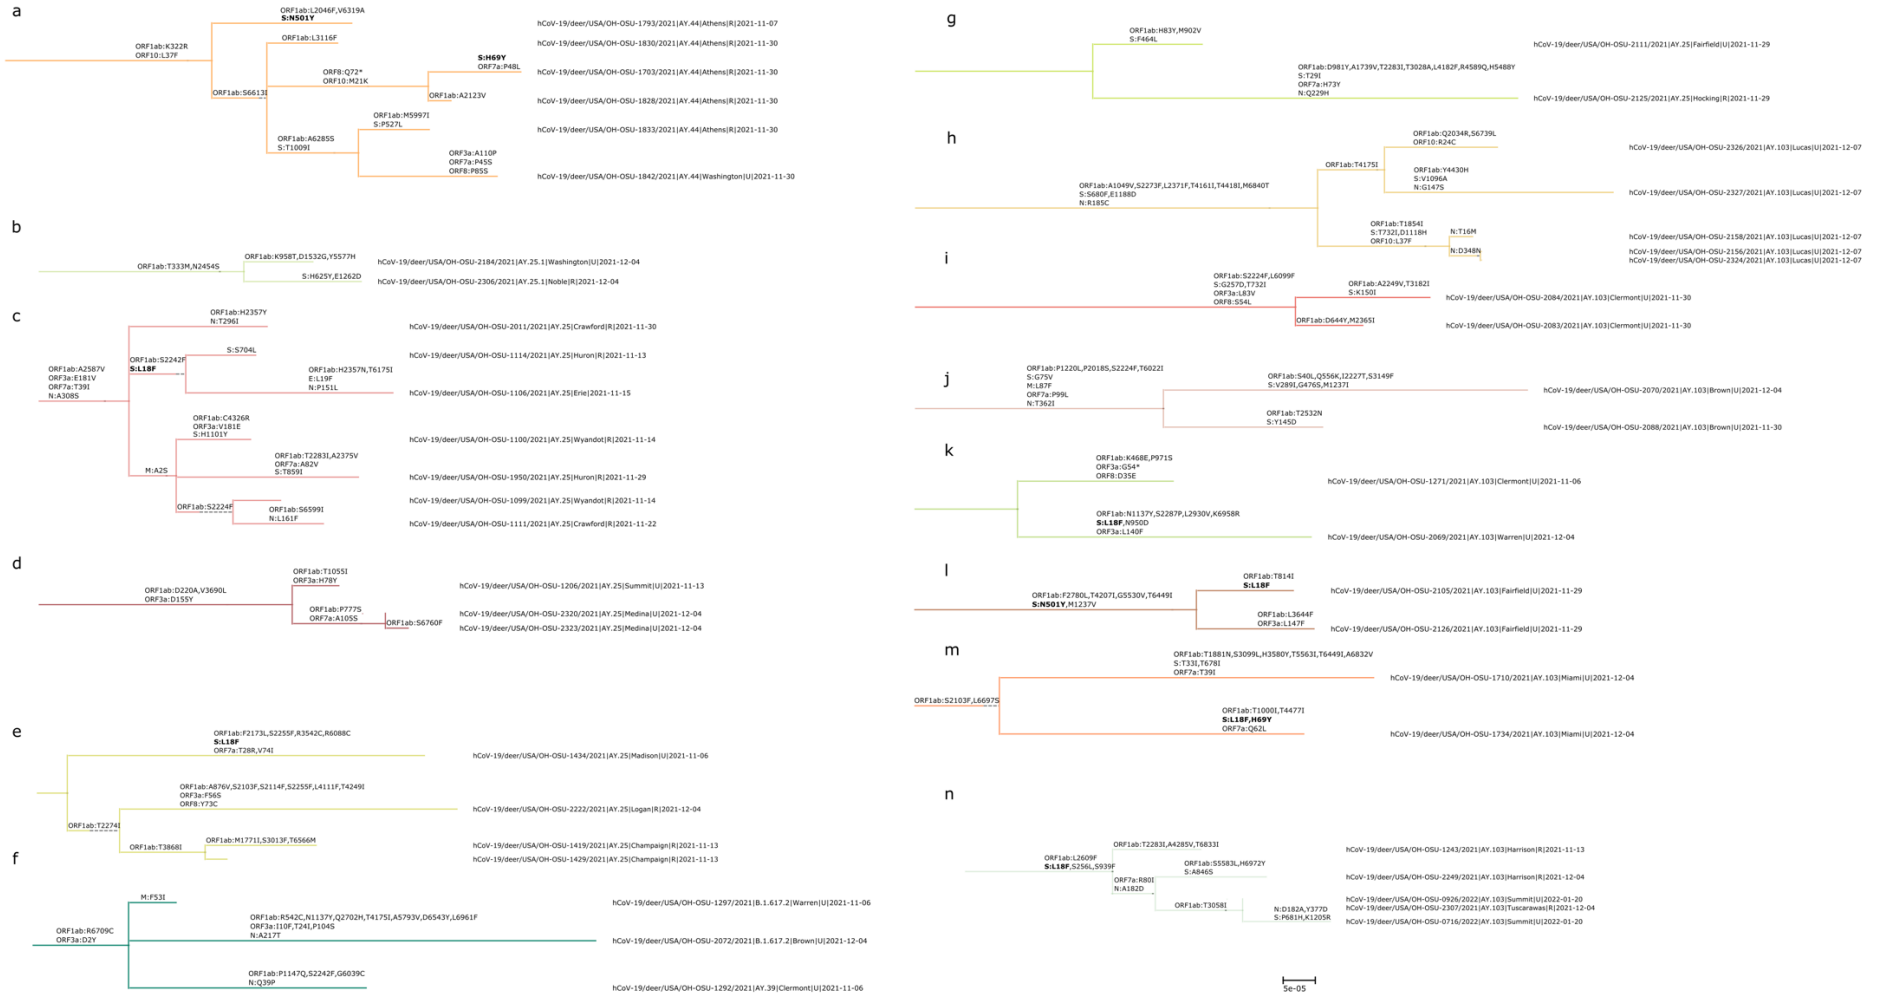

**Figure S19. Transmission clusters in white-tailed deer Delta dataset.** Missense mutations are shown on the branches. Recurring mutations in Spike with known phenotypic effects are shown in bold.

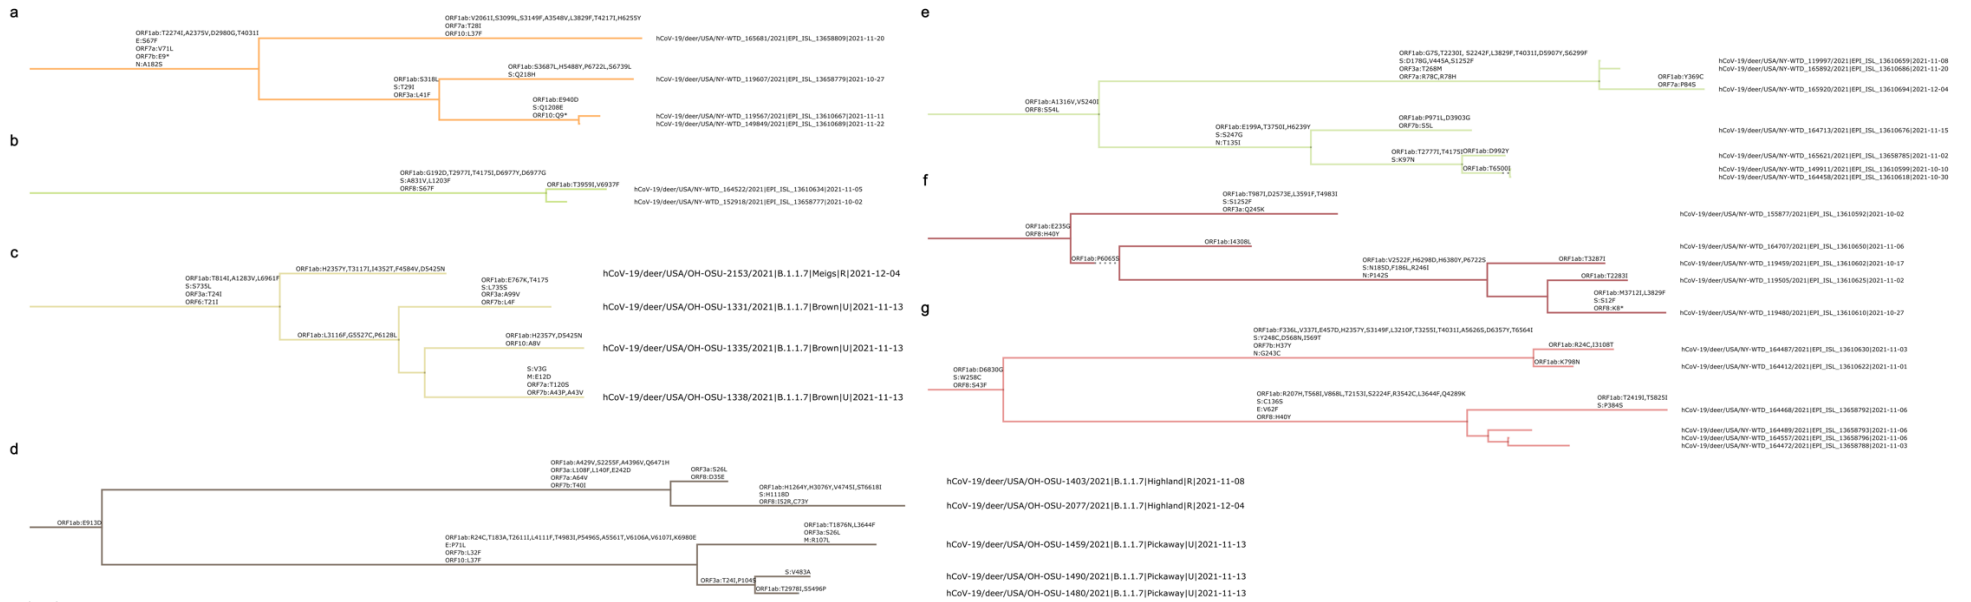

**Figure S20. All transmission clusters in white-tailed deer Alpha dataset.** (c) and (d) correspond to two clusters found in Ohio, members of which were sequenced in this study, while other clusters correspond to data collected in NY state and was downloaded from GISAID. Missense mutations are shown on the branches. Recurring mutations in Spike with known phenotypic effects are shown in bold.

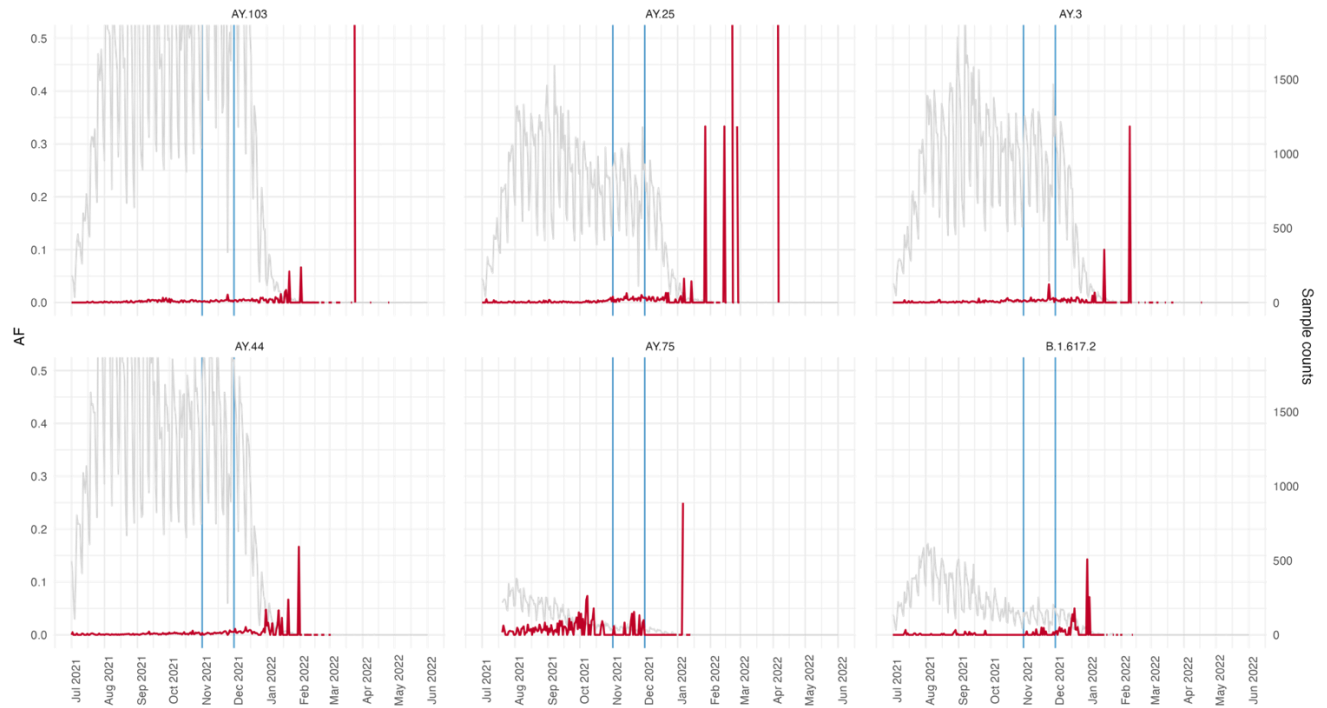

**Figure S21. Changes in S:L18F in six Delta lineages in human population.** Red line – portion of human samples with mutation among all samples from particular lineage on the particular day. Grey line – total number of samples collected from the lineage on that day. Blue lines show the interval in which samples from white-tailed deer with L18F were collected.

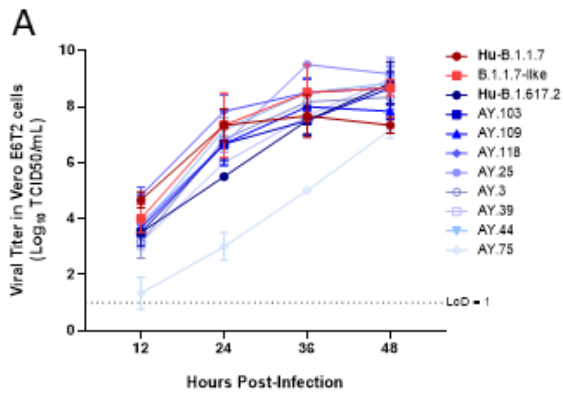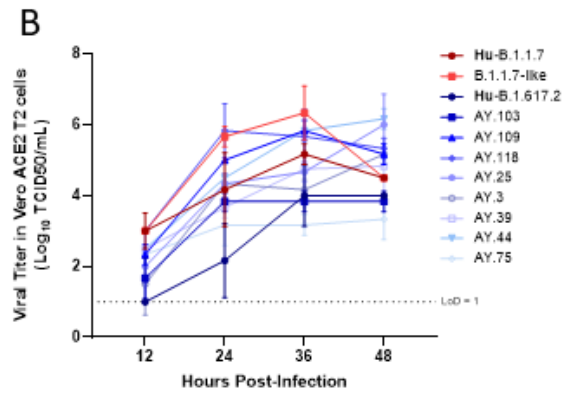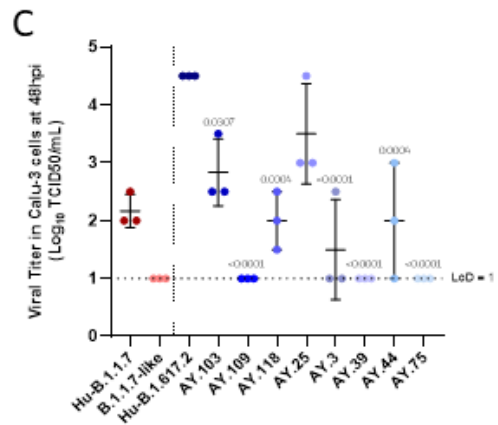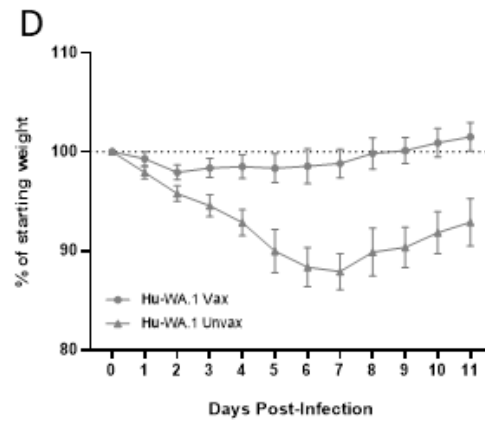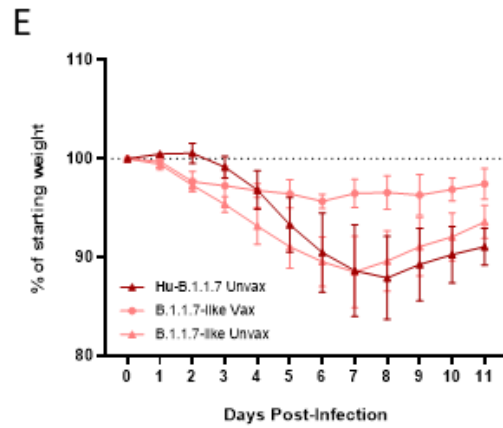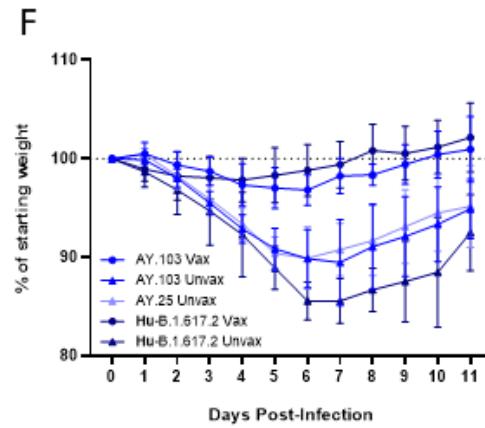

**Figure S22. Growth analysis in vitro and body weight loss for Syrian hamsters experimentally infected with SARS-CoV-2.** (A) Replication kinetics in VeroE6T2 cells. (B) Replication kinetics in VeroE6A2T2 cells. (C) Virus titers in Calu-3 cells at 48-hour post infection. Viral titers expressed as log<sub>10</sub> TCID<sub>50</sub>/mL were plotted with bars representing mean and standard deviation (n = 3). Statistical analysis was performed using one-way ANOVA with multiple comparisons using Tukey post hoc, p-values displayed from Tukey's test statistic, q, which controls for family wise error rate for multiple comparison. (D-F) Body weight loss comparison between unvaccinated and BNT162b2 vaccinated animals. Golden Syrian hamsters were challenged with Hu-WA.1 (unvaccinated n = 12, vaccinated n = 12), Hu-B.1.1.7 (unvaccinated n = 4), B.1.1.7-like (unvaccinated n = 13, vaccinated n = 13), Hu-B.1.617.2 (unvaccinated n = 11, vaccinated n = 12), AY.103 (unvaccinated n = 13, vaccinated n = 13), and AY.25 (unvaccinated n = 10). Animal sample sizes reflect biologically independent animals. Mean weights as a percentage of starting weight were plotted. Error bars represent standard deviation.

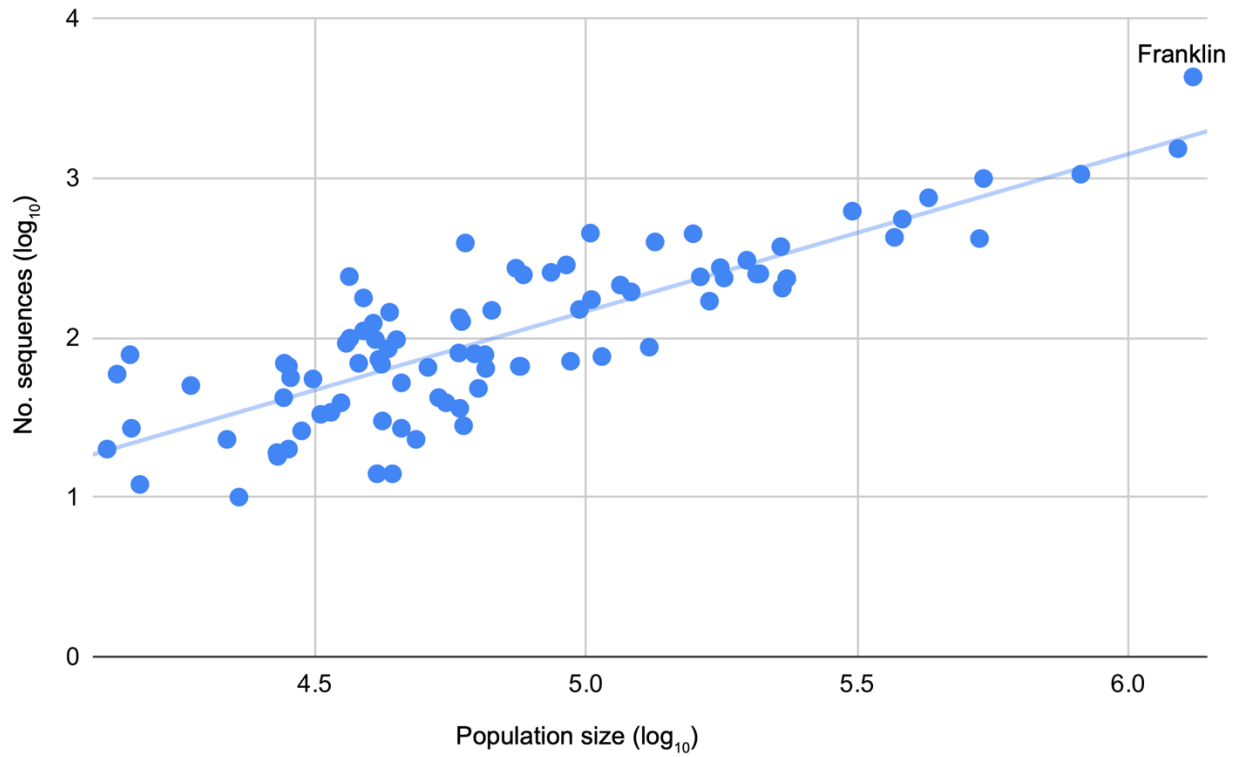

**Figure S23. Spatial representation of Ohio SARS-CoV-2 sequences.** The number of SARS-CoV-2 sequences an Ohio county that are available from GISAID during the study period (y-axis) is proportional to the population size of that county (x-axis).

## Supplementary Materials References

1. Pekar, J. E. *et al.* The molecular epidemiology of multiple zoonotic origins of SARS-CoV-2. *Science* **377**, 960–966 (2022).
2. Sharp, P. M., Tuohy, T. M. F. & Mosurski, K. R. Codon usage in yeast: cluster analysis clearly differentiates highly and lowly expressed genes. *Nucleic Acids Research* **14**, 5125–5143 (1986).
