# Supplementary material for: Accelerated evolution of SARS-CoV-2 in free-ranging white-tailed deer
Source: PubMed Central journal article supplement (PMC10462754; doi:10.1038/s41467-023-40706-y), 2023-08-28
Supplement: 41467_2023_40706_MOESM3_ESM.pdf [file 41467_2023_40706_MOESM3_ESM.pdf]

## **Description of Additional Supplementary Files**

**Supplementary Data 1.** All mutations in white-tailed deer clusters for Delta and Alpha datasets.

**Supplementary Data 2.** Recurrent mutations and mutations with known phenotypes in delta and alpha datasets. Delta clusters include only Ohio white-tailed deer; Alpha clusters include all available white-tailed deer samples.

**Supplementary Data 3.** GISAID acknowledgement of data contributors table for deer origin SARS-CoV-2 background sequence dataset used in analyses for this study.

**Supplementary Data 4.** GISAID acknowledgment of data contributors table for human origin SARS-CoV-2 background sequence dataset used in analyses for this study.
